# Supplementary material
Source: PubMed Central journal article supplement (PMC7324353)

**A novel pipeline of 2-(benzenesulfonamide)-N-(4-hydroxyphenyl) acetamide analgesics that lack hepatotoxicity and retain antipyresis**

Hernan A. Bazan,<sup>a,1\*</sup> Surjyadipta Bhattacharjee,<sup>b,1</sup> Carolina Burgos,<sup>c</sup> Javier Recio,<sup>c</sup> Valentina Abet,<sup>c</sup> Amanda R. Pahng,<sup>d,e</sup> Bokkyoo Jun,<sup>b</sup> Jessica Heap,<sup>b</sup> Alexander J. Ledet,<sup>b</sup> William C. Gordon,<sup>b</sup> Scott Edwards,<sup>b,d</sup> Dennis Paul,<sup>f</sup> Julio Alvarez-Buillac and Nicolas G. Bazan<sup>b</sup>

<sup>a</sup>Section of Vascular/Endovascular Surgery, Department of Surgery, Ochsner Clinic, New Orleans, LA 70118 USA

<sup>b</sup>Neuroscience Center of Excellence, School of Medicine, Louisiana State University Health New Orleans, New Orleans, LA 70112 USA

<sup>c</sup>Department of Organic Chemistry and IQAR, University of Alcalá, Alcalá de Henares, Madrid 28805 Spain

<sup>d</sup>Department of Physiology, School of Medicine, Louisiana State University Health New Orleans, New Orleans, LA 70112 USA

<sup>e</sup>Southeast Louisiana Veterans Health Care System, New Orleans, LA 70119 USA

<sup>f</sup>Department of Pharmacology and Experimental Therapeutics, School of Medicine, Louisiana State University Health New Orleans, New Orleans, LA 70112 USA

<sup>1</sup>Share first authorship

\*Corresponding author: Hernan Bazan, MD, FACS, 1514 Jefferson Hwy., New Orleans, LA 70121 USA. Phone: +1 (504) 842-9050; E-mail: [hbazan@ochsner.org](mailto:hbazan@ochsner.org).

## 2-[[2-(4-Hydroxyanilino)-2-oxo-ethyl]sulfamoyl]benzamide 3a.

<sup>1</sup>H-NMR 200 MHz, DMSO-d<sub>6</sub>

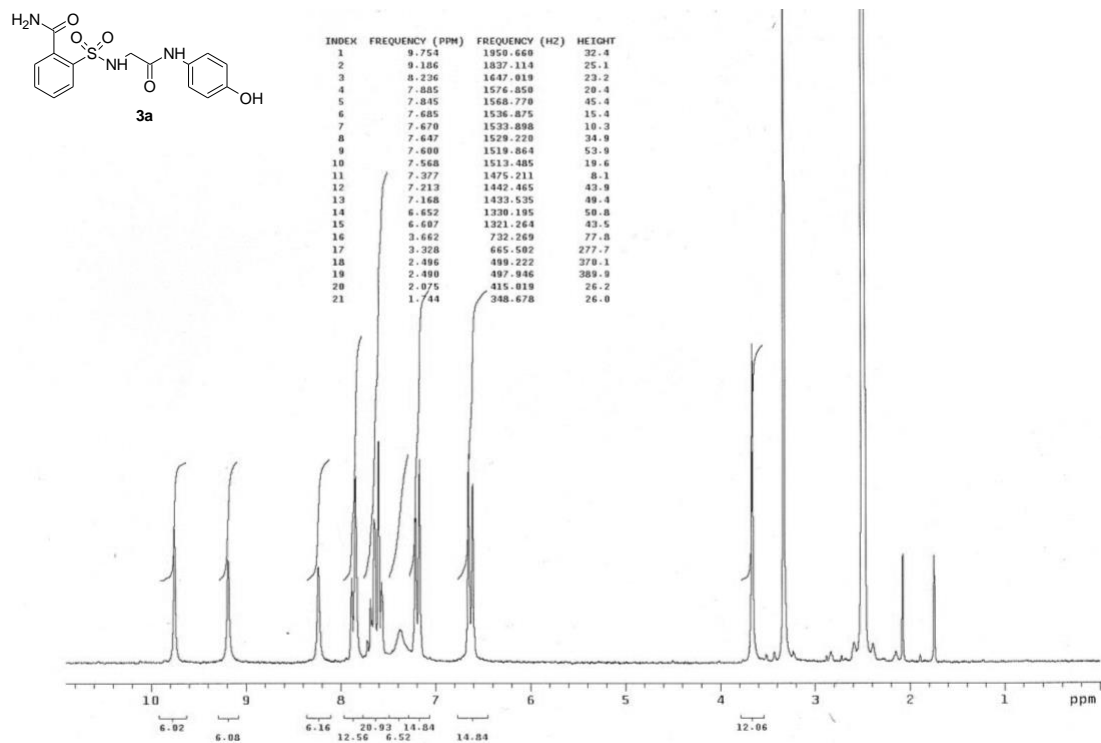

## 2-[[2-(4-Hydroxyanilino)-2-oxo-ethyl]sulfamoyl]benzamide 3a

<sup>13</sup>C-NMR 75 MHz, CD<sub>3</sub>OD

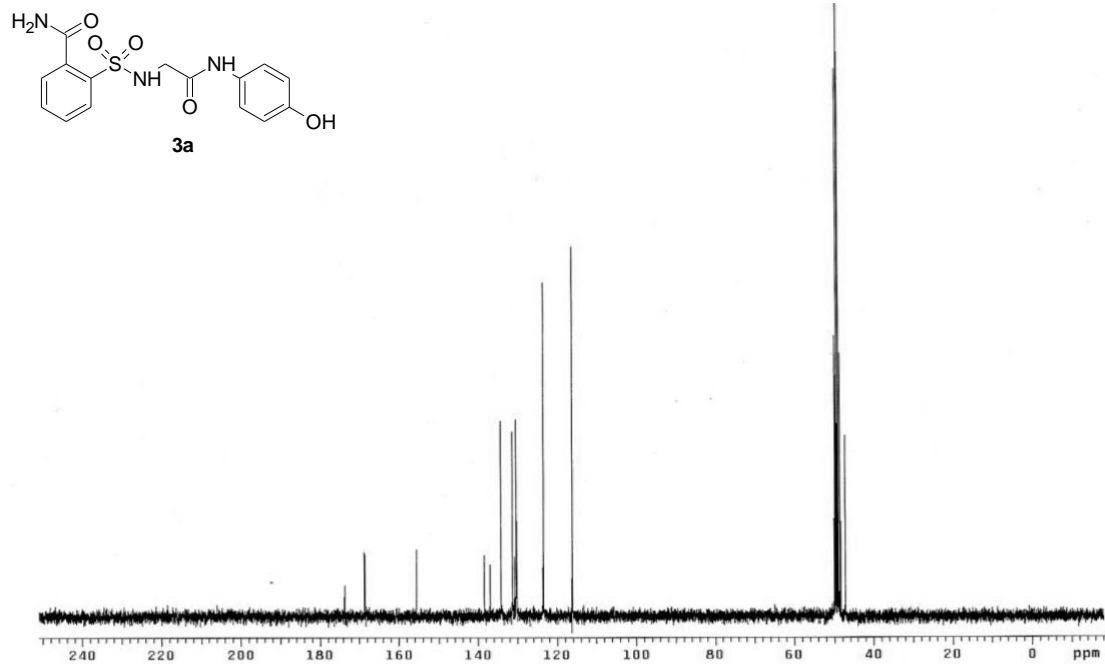

2-[[2-(4-Hydroxyanilino)-2-oxo-ethyl]sulfamoyl]-*N*-methylbenzamide **3b**

<sup>1</sup>H-NMR 300 MHz, DMSO-*d*<sub>6</sub>

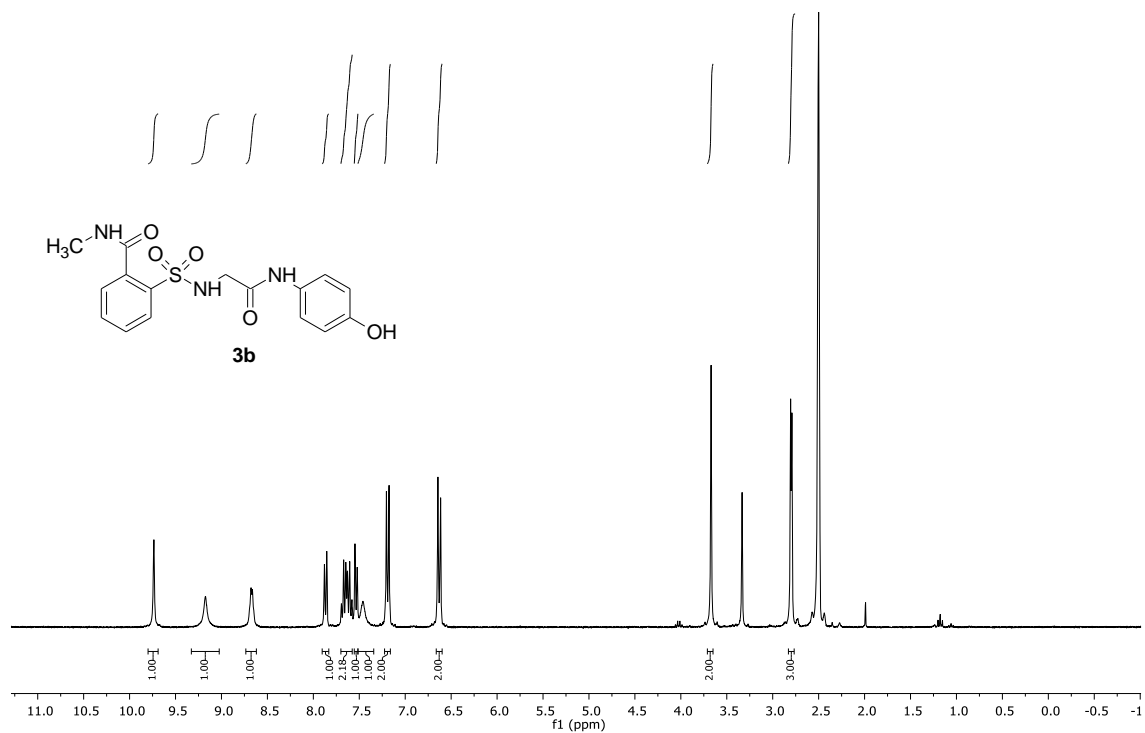

2-[[2-(4-Hydroxyanilino)-2-oxo-ethyl]sulfamoyl]-*N*-methylbenzamide **3b**

<sup>13</sup>C-NMR 75 MHz, DMSO-*d*<sub>6</sub>

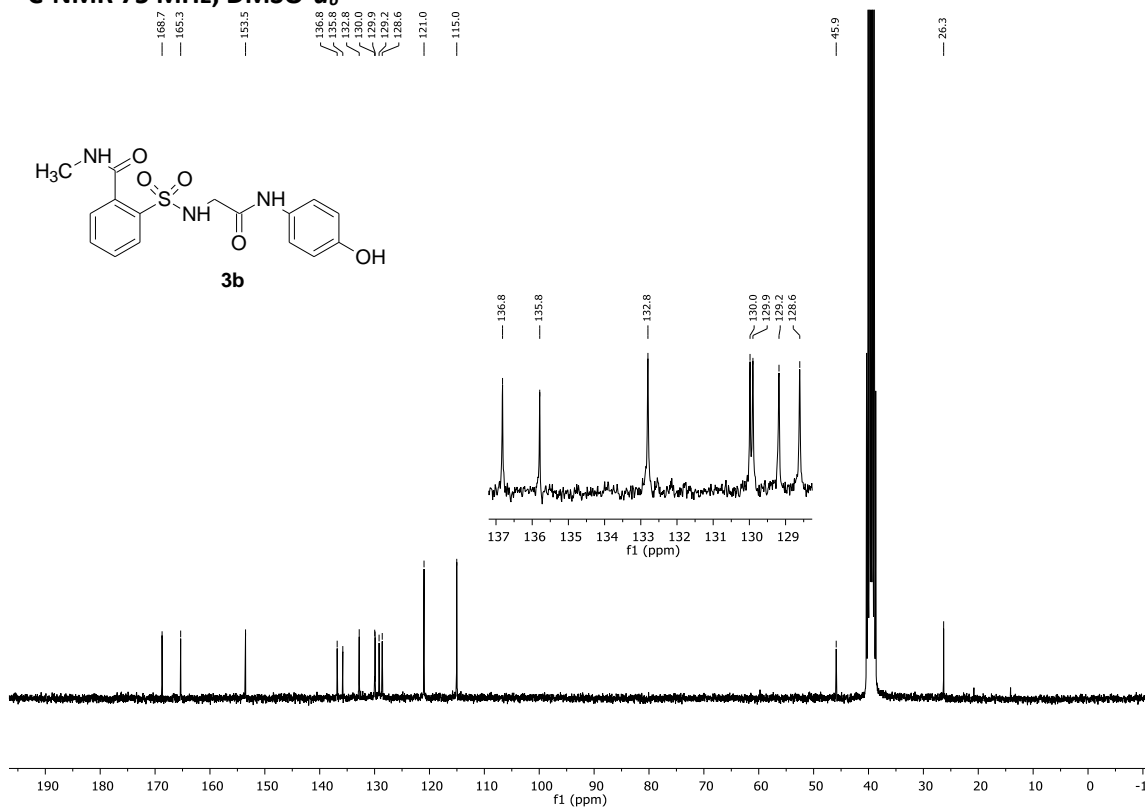

2-[[2-(4-Hydroxyanilino)-2-oxo-ethyl]sulfamoyl]-*N,N*-dimethylbenzamide 3c

<sup>1</sup>H-NMR 200 MHz, DMSO-*d*<sub>6</sub>

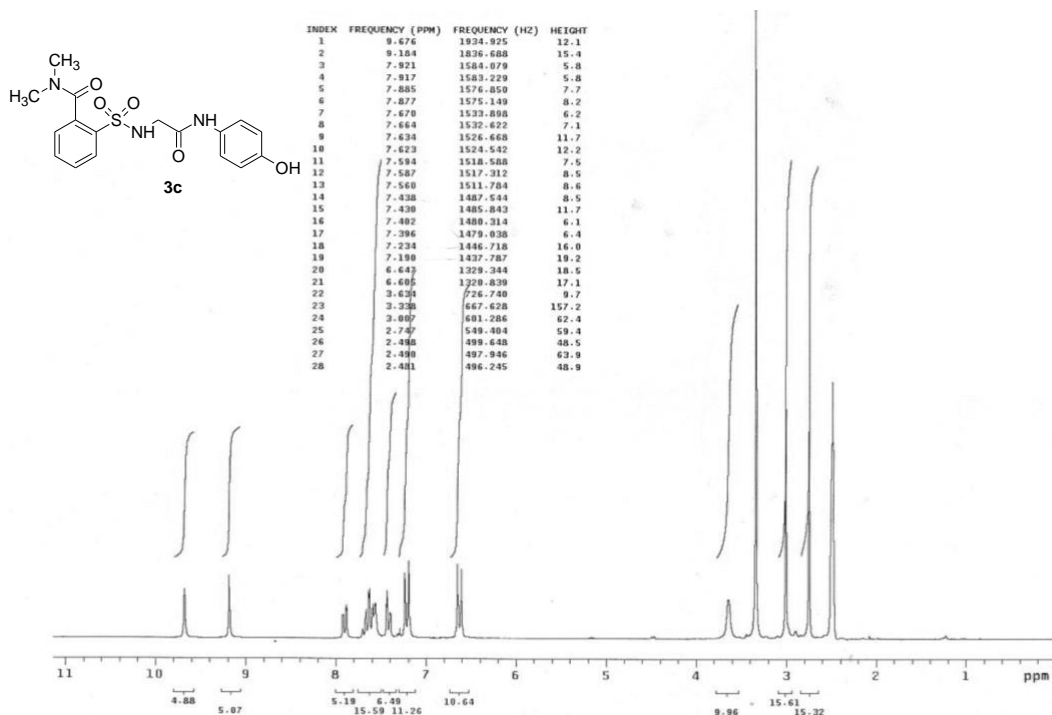

2-[[2-(4-Hydroxyanilino)-2-oxo-ethyl]sulfamoyl]-*N,N*-dimethylbenzamide 3c

<sup>13</sup>C-NMR 50 MHz, DMSO-*d*<sub>6</sub>

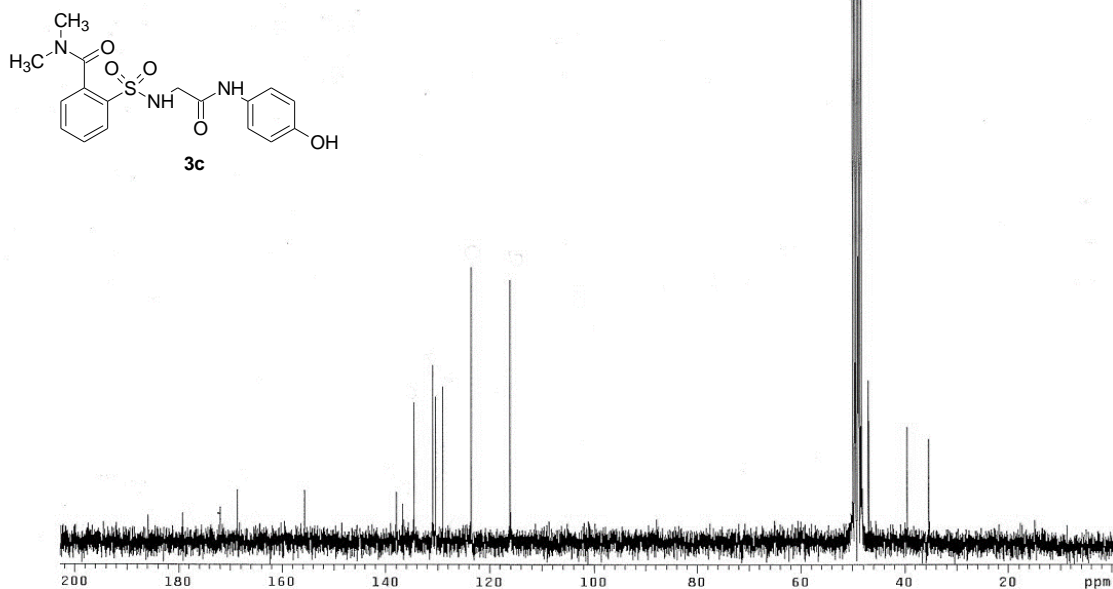

**2-[[2-(4-Hydroxyanilino)-2-oxo-ethyl]sulfamoyl]-N-(2-hydroxyethyl)-N-methyl-benzamide 3d**

**<sup>1</sup>H-NMR 300 MHz, DMSO-*d*<sub>6</sub>**

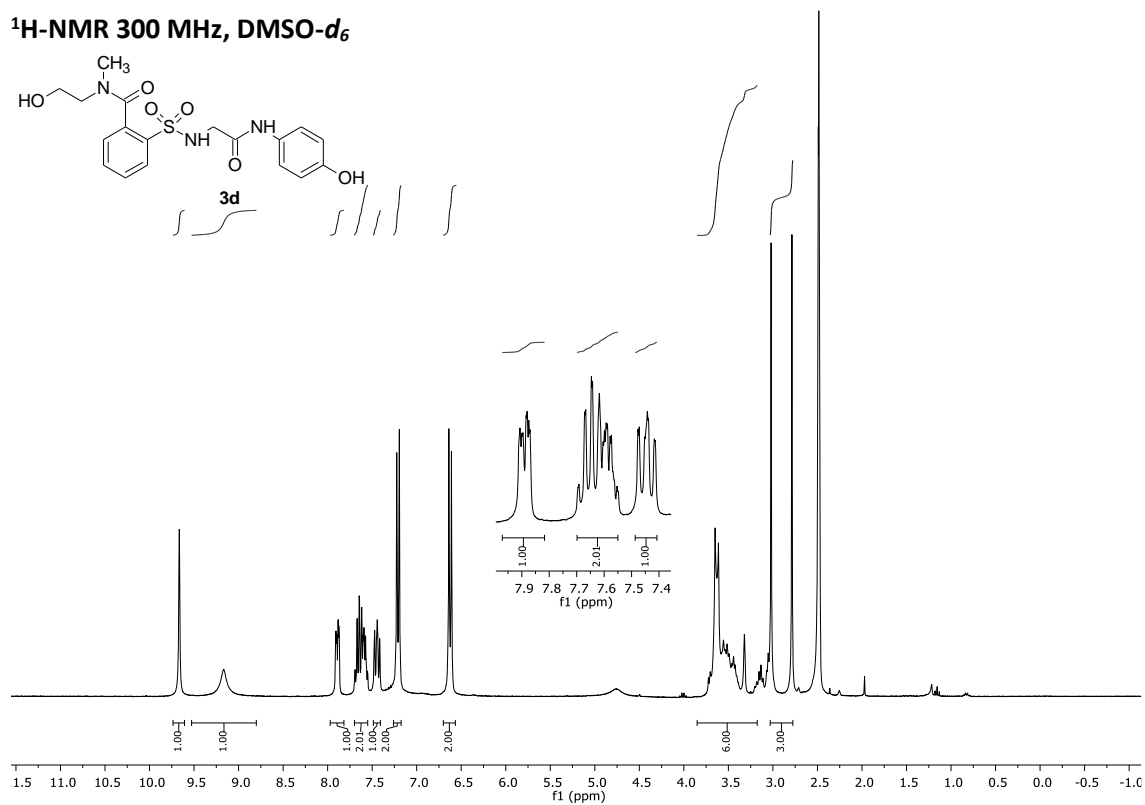

**2-[[2-(4-Hydroxyanilino)-2-oxo-ethyl]sulfamoyl]-N-(2-hydroxyethyl)-N-methyl-benzamide 3d**

**<sup>13</sup>C-NMR 75 MHz, CD<sub>3</sub>OD**

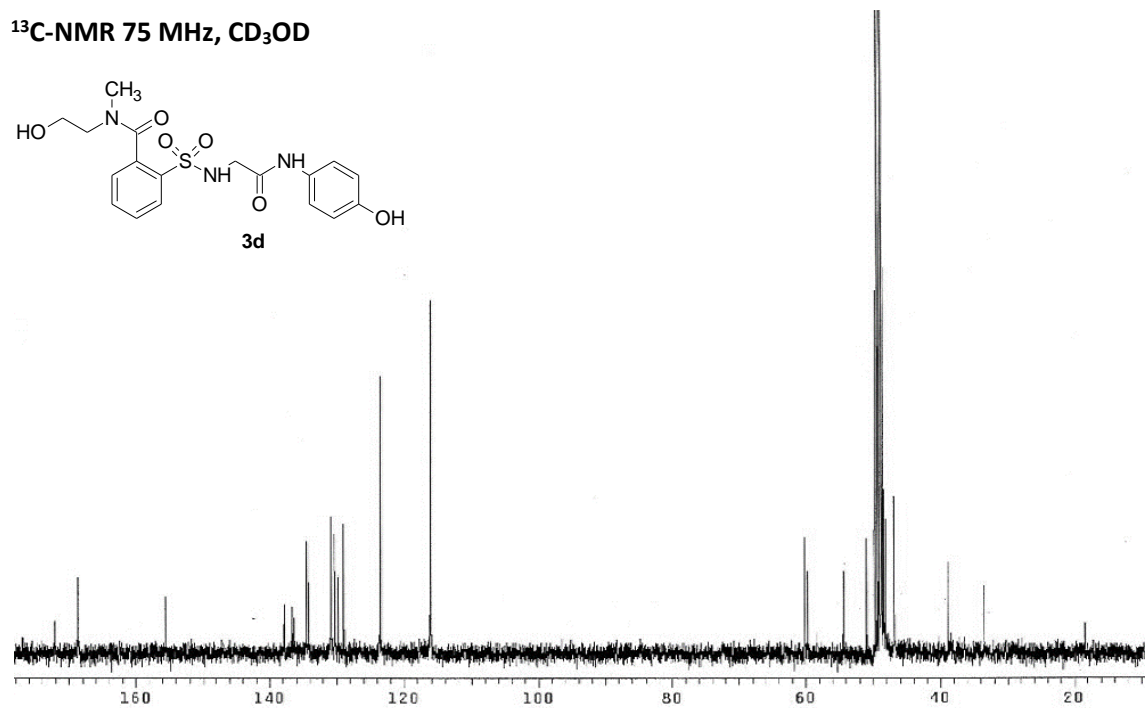

### *N*-Butyl-2-[[2-(4-hydroxyanilino)-2-oxo-ethyl]sulfamoyl]benzamide **3e**

<sup>1</sup>H-NMR 300 MHz, DMSO-*d*<sub>6</sub>

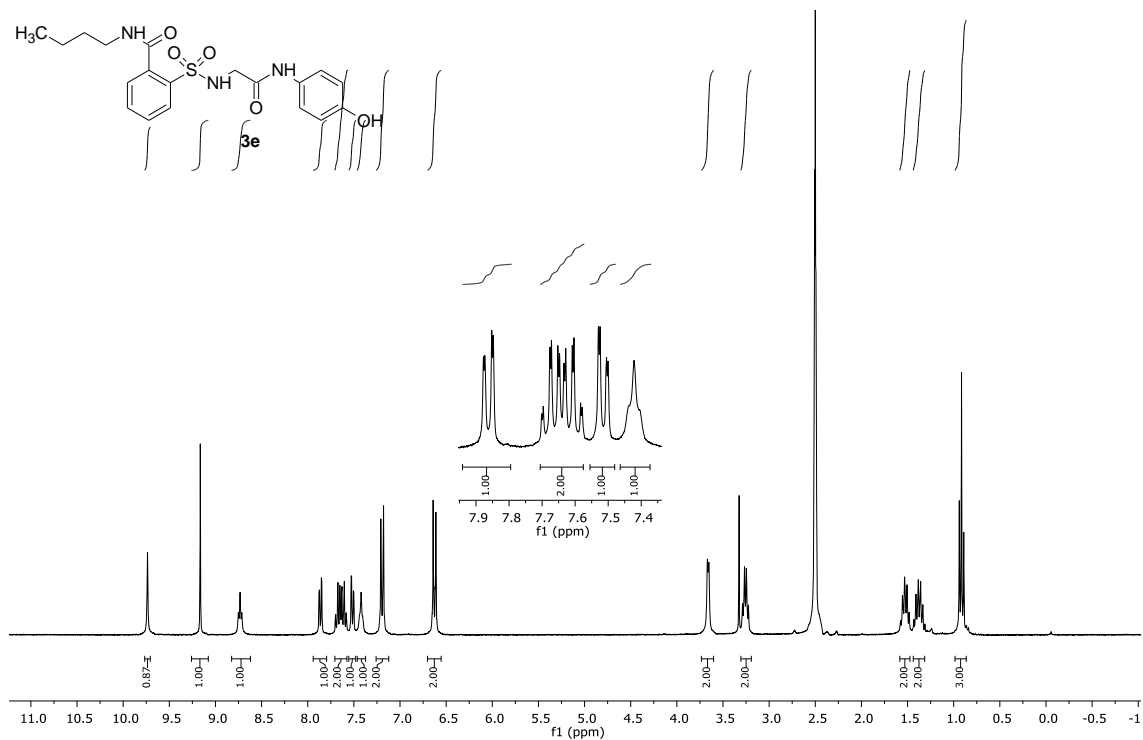

### *N*-Butyl-2-[[2-(4-hydroxyanilino)-2-oxo-ethyl]sulfamoyl]benzamide **3e**

<sup>13</sup>C-NMR 75 MHz, CD<sub>3</sub>OD.

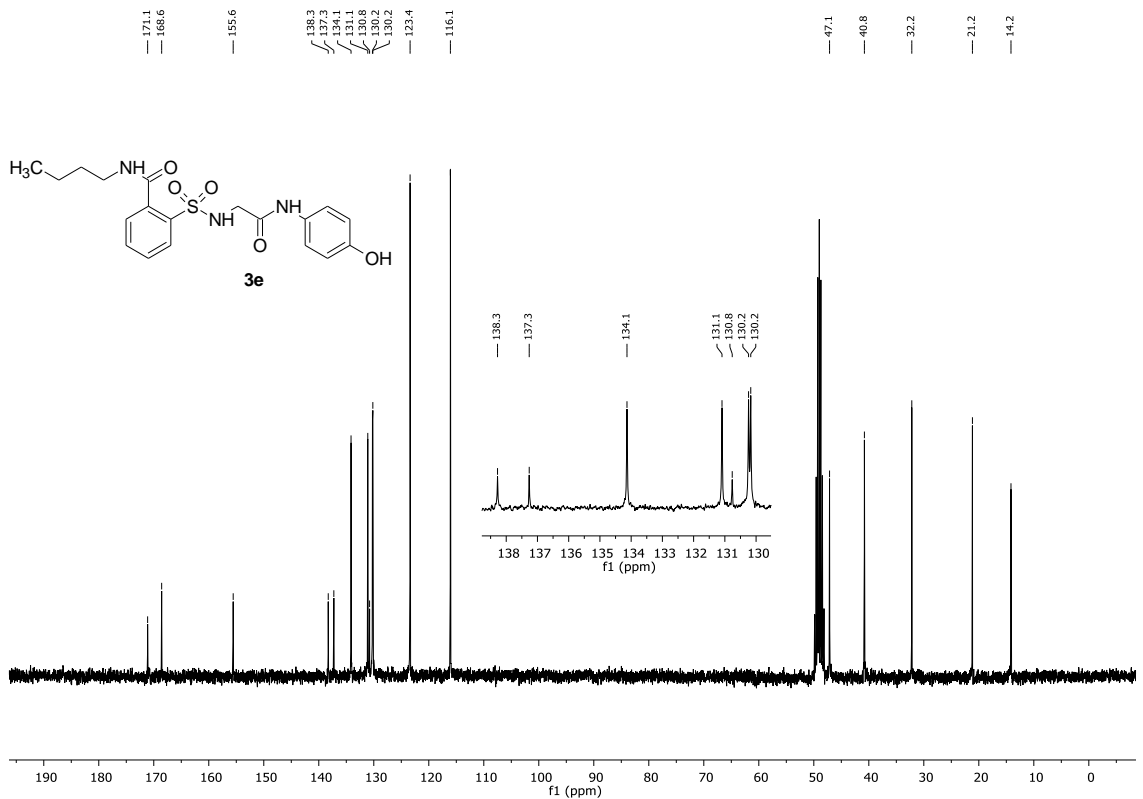

## 2-[[2-(4-Hydroxyanilino)-2-oxo-ethyl]sulfamoyl]-*N*-isopropylbenzamide 3f

<sup>1</sup>H-NMR 300 MHz, DMSO-*d*<sub>6</sub>

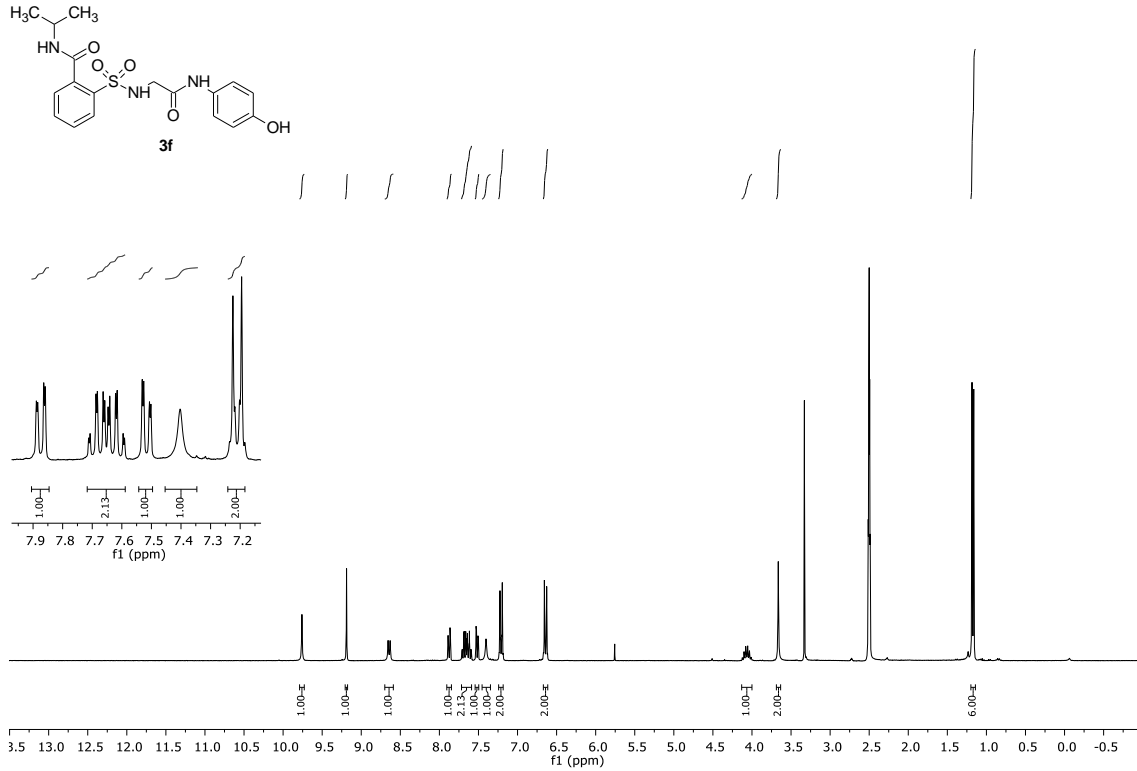

## 2-[[2-(4-Hydroxyanilino)-2-oxo-ethyl]sulfamoyl]-*N*-isopropylbenzamide 3f

<sup>13</sup>C-NMR 75 MHz, CD<sub>3</sub>OD

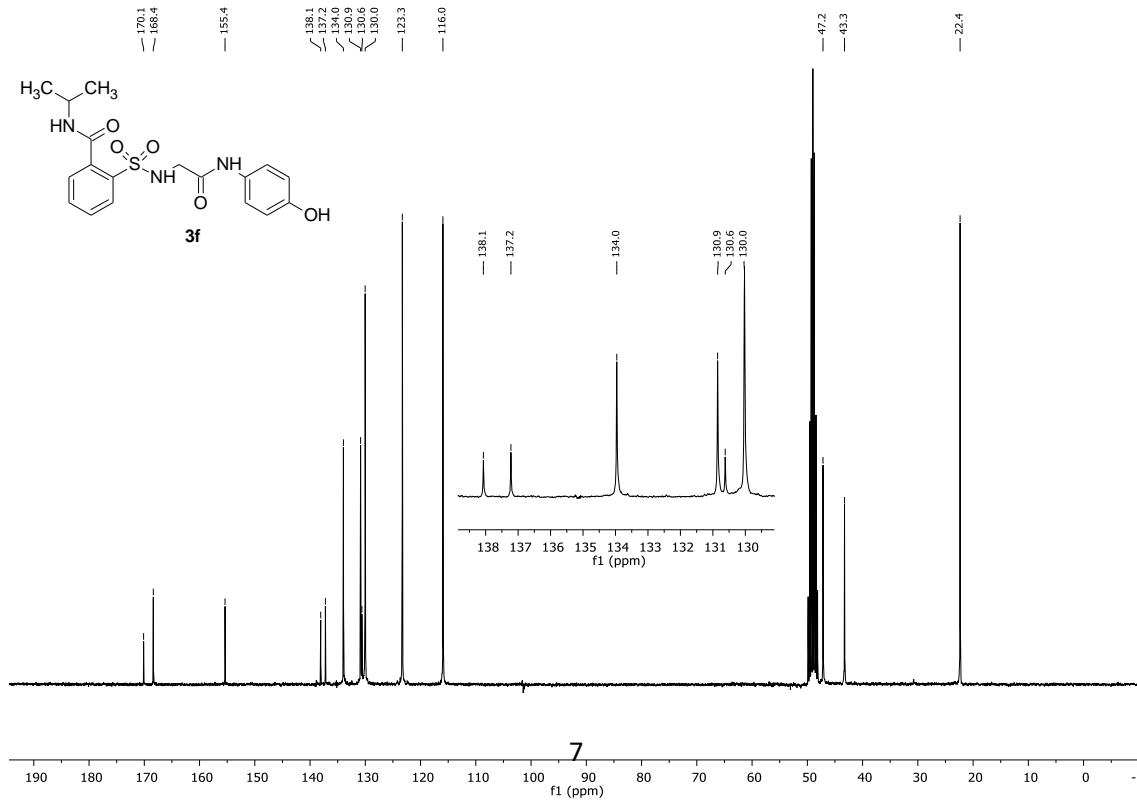

2-[[2-(4-Hydroxyanilino)-2-oxo-ethyl]sulfamoyl]-*N*-isobutylbenzamide 3g

<sup>1</sup>H-NMR 300 MHz, DMSO-*d*<sub>6</sub>

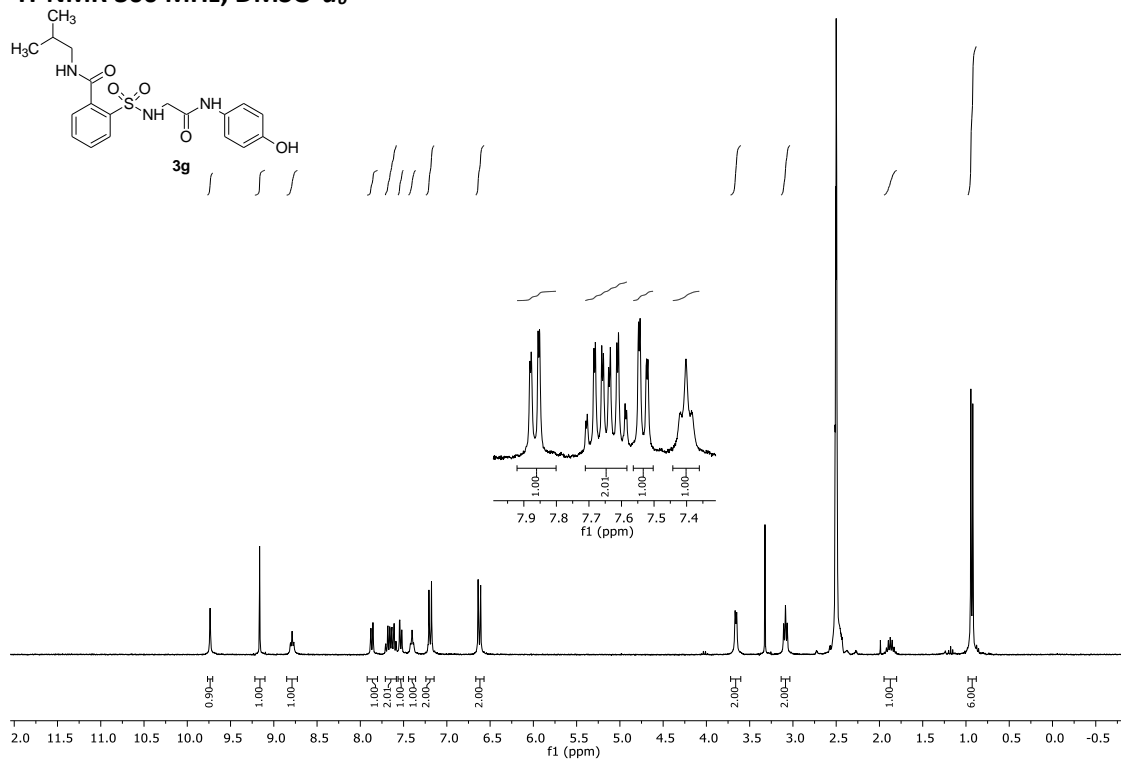

2-[[2-(4-Hydroxyanilino)-2-oxo-ethyl]sulfamoyl]-*N*-isobutylbenzamide 3g

<sup>13</sup>C-NMR 75 MHz, CD<sub>3</sub>OD

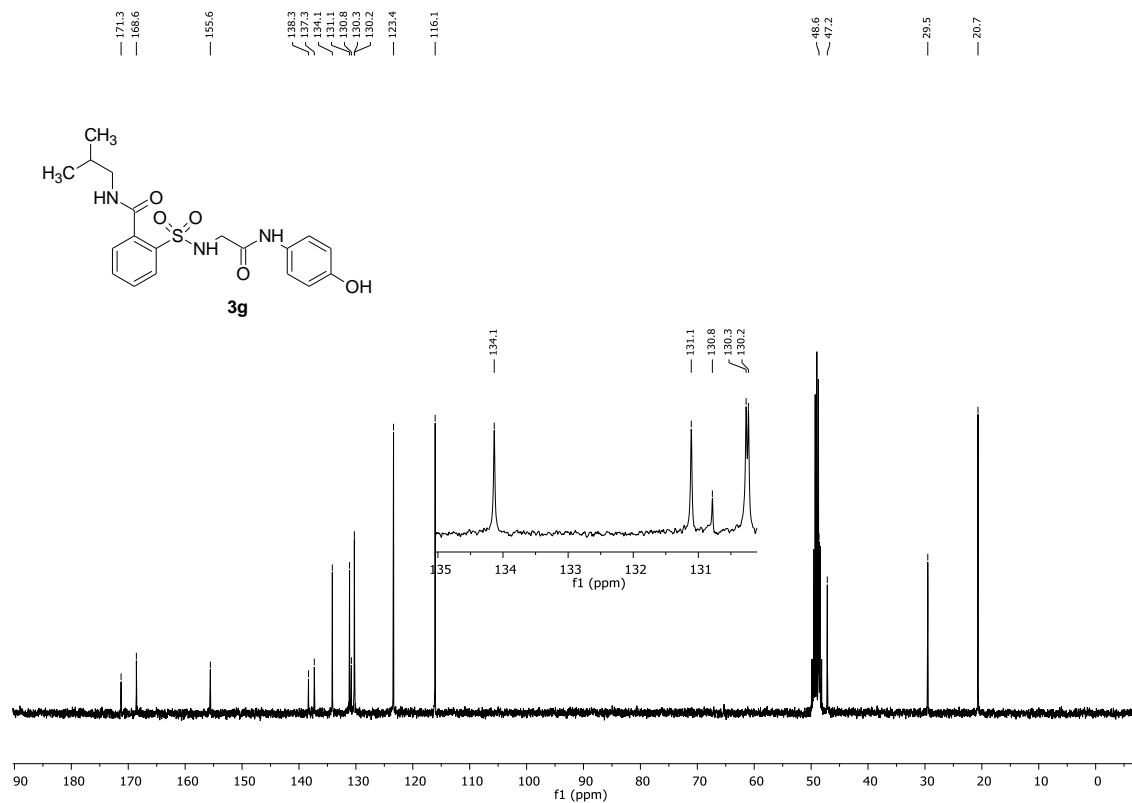



***N*-(3-Amino-2-hydroxypropyl)-2-[[2-(4-hydroxyanilino)-2-oxo-ethyl]sulfamoyl]benzamide 3h**

<sup>1</sup>H-NMR 200 MHz, CD<sub>3</sub>OD

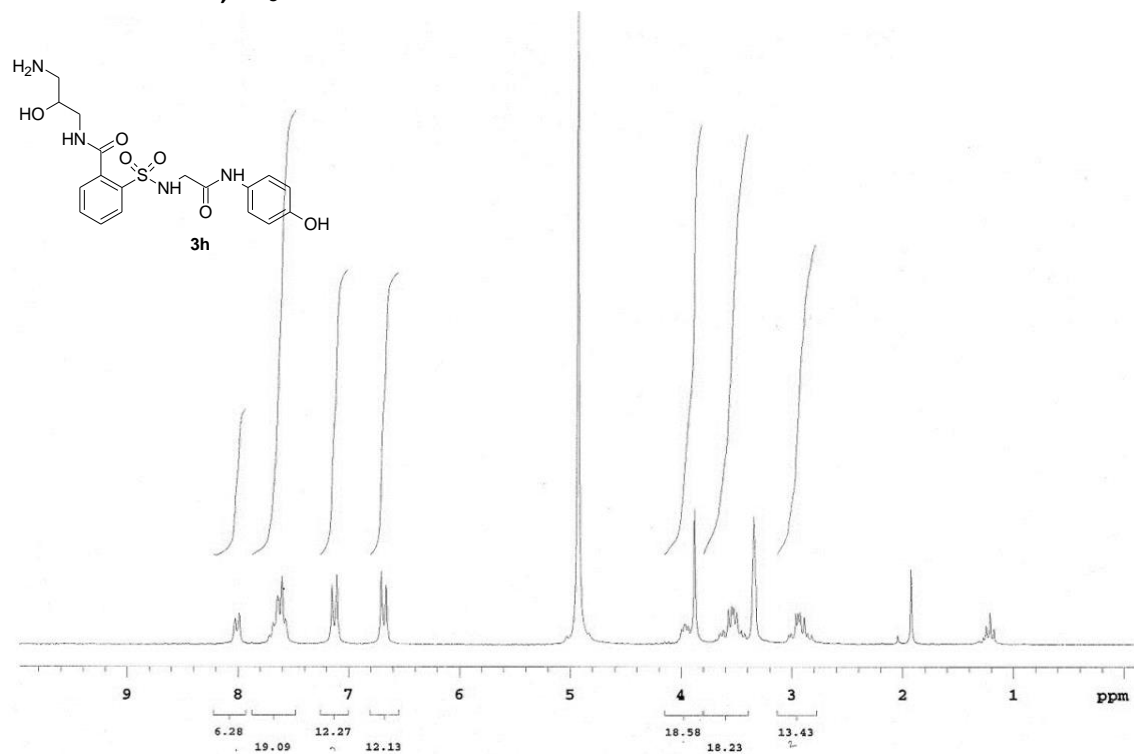

***N*-(3-Amino-2-hydroxypropyl)-2-[[2-(4-hydroxyanilino)-2-oxo-ethyl]sulfamoyl]benzamide 3h**

<sup>13</sup>C-NMR 75 MHz, DMSO-*d*<sub>6</sub>

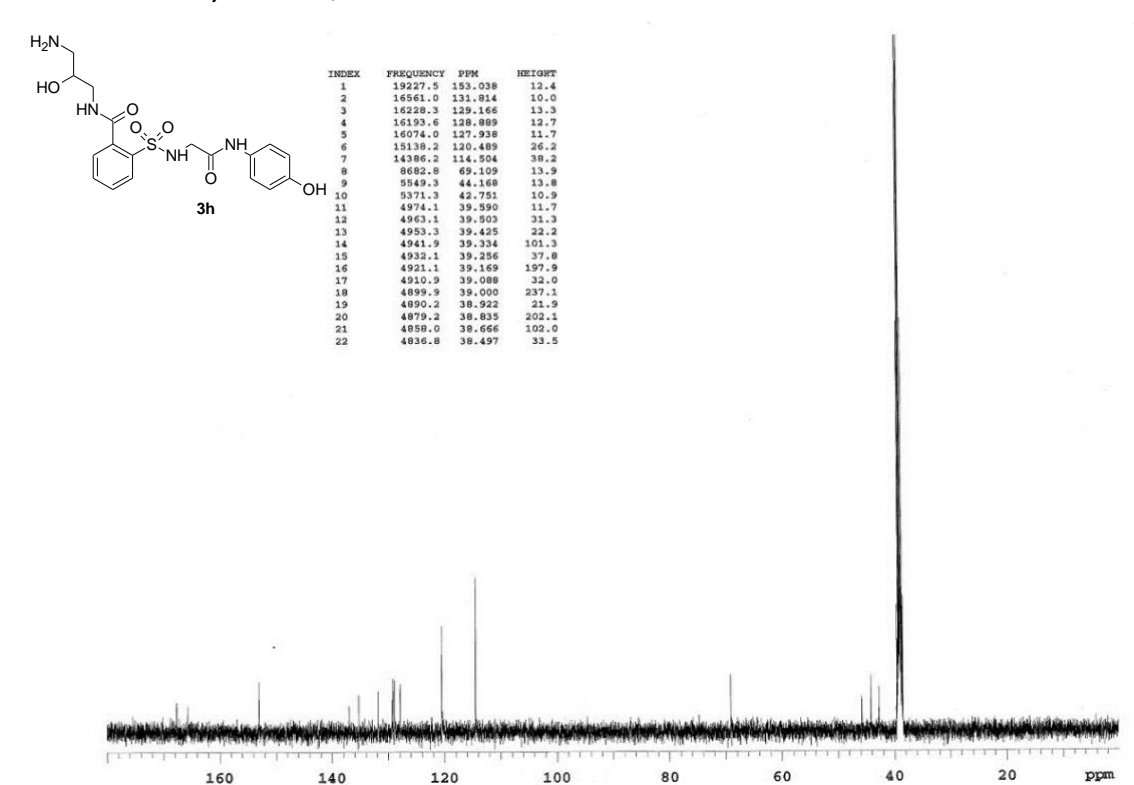

**N-Cyclopentyl-2-[[2-(4-hydroxyanilino)-2-oxo-ethyl]sulfamoyl]benzamide 3i**

**<sup>1</sup>H-NMR 300 MHz, CD<sub>3</sub>OD**

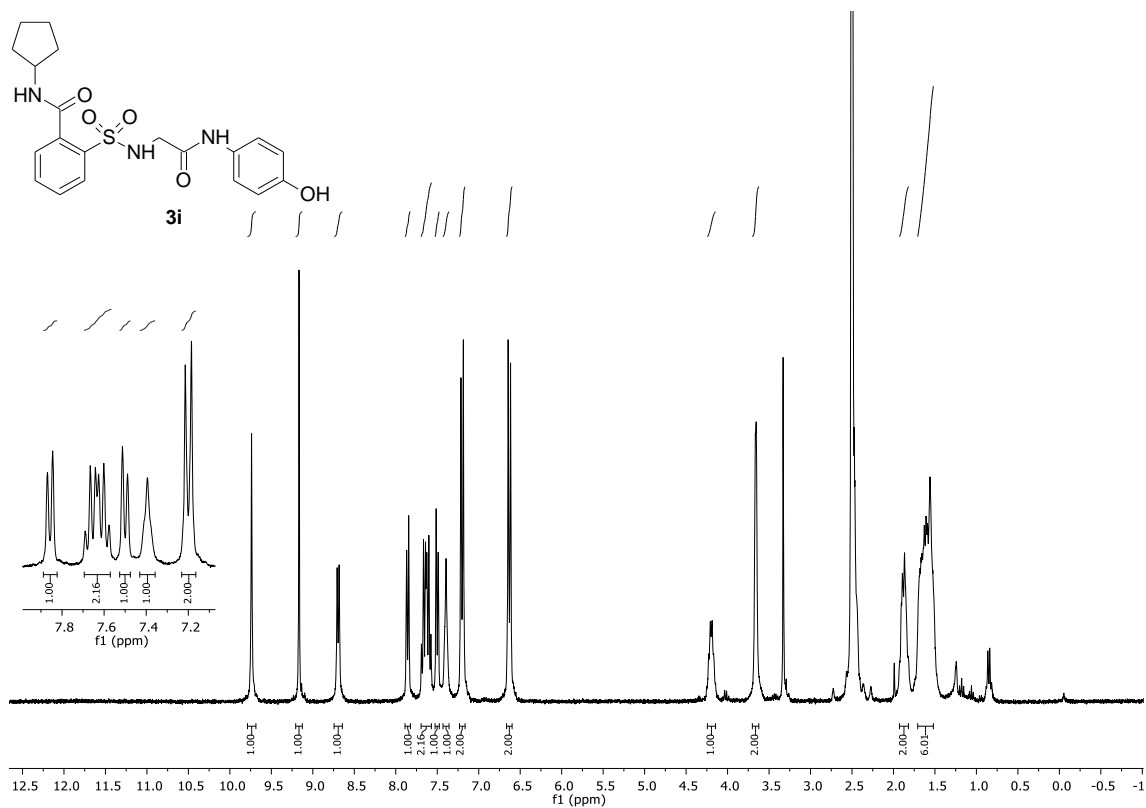

**N-Cyclopentyl-2-[[2-(4-hydroxyanilino)-2-oxo-ethyl]sulfamoyl]benzamide 3i**

**<sup>13</sup>C-NMR 300 MHz, CD<sub>3</sub>OD**

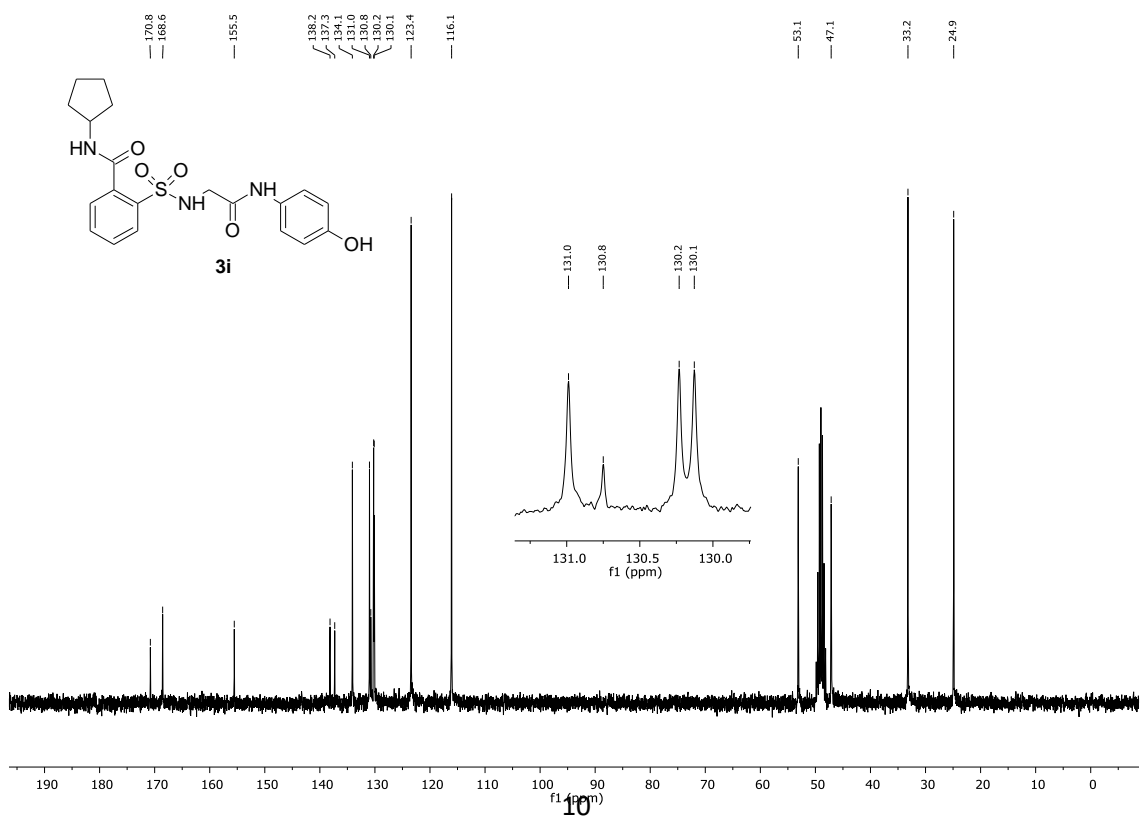

**N-Benzyl-2-[[2-(4-hydroxyanilino)-2-oxo-ethyl]sulfamoyl]benzamide 3j**

**<sup>1</sup>H-NMR 300 MHz, DMSO-d<sub>6</sub>**

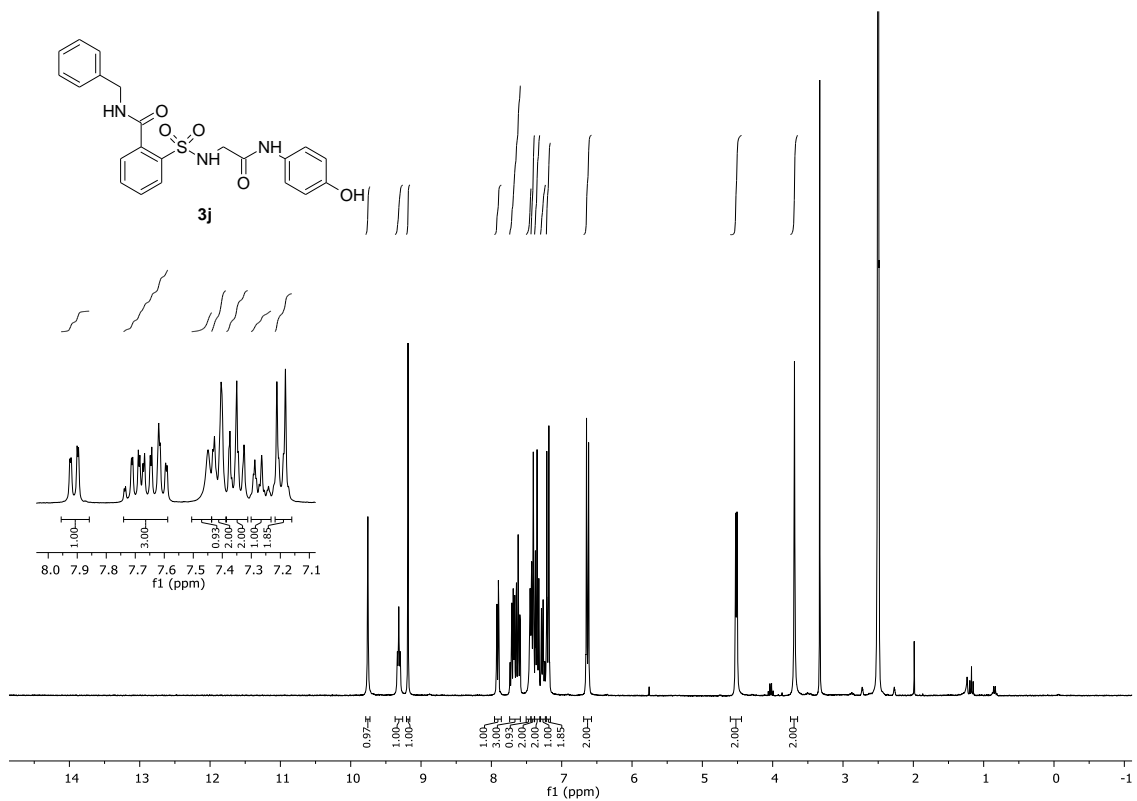

**N-Benzyl-2-[[2-(4-hydroxyanilino)-2-oxo-ethyl]sulfamoyl]benzamide 3j**

**<sup>13</sup>C-NMR 75 MHz, DMSO-d<sub>6</sub>**

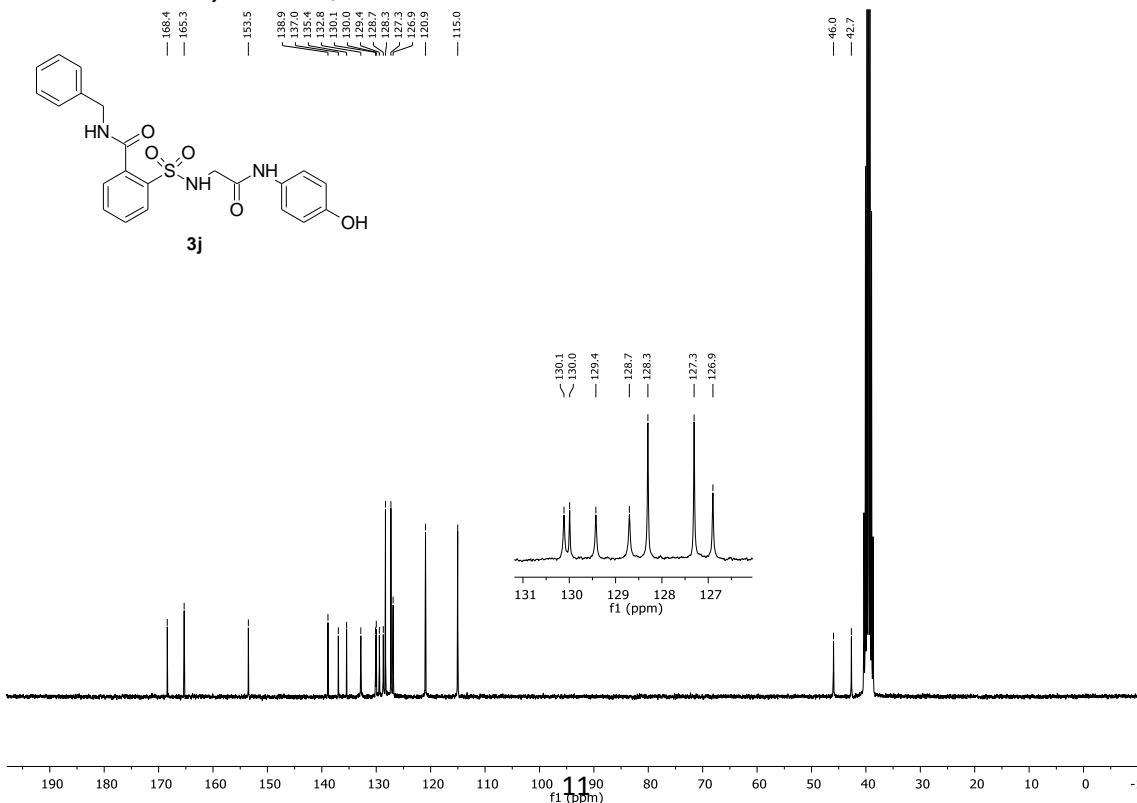

2-[[2-(4-Hydroxyanilino)-2-oxo-ethyl]sulfamoyl]-N-[(4-methylphenyl)methyl]benzamide 3k

<sup>1</sup>H-NMR 300 MHz, DMSO-d<sub>6</sub>

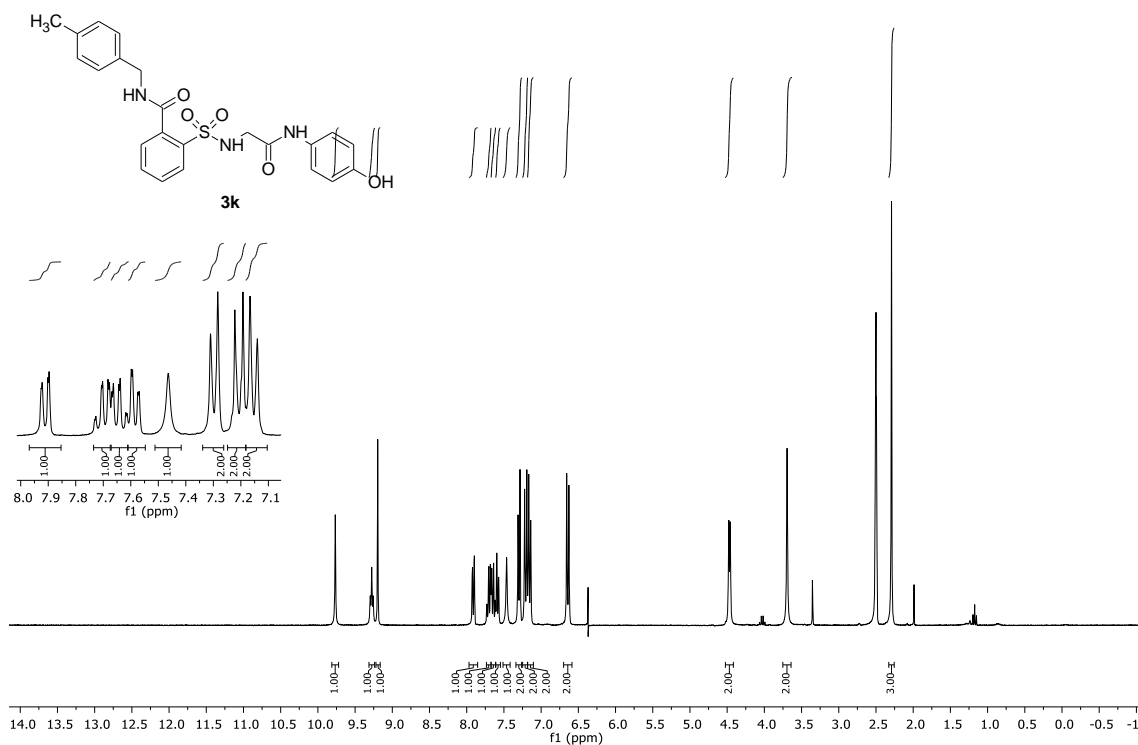

2-[[2-(4-Hydroxyanilino)-2-oxo-ethyl]sulfamoyl]-N-[(4-methylphenyl)methyl]benzamide 3k

<sup>13</sup>C-NMR 75 MHz, DMSO-d<sub>6</sub>

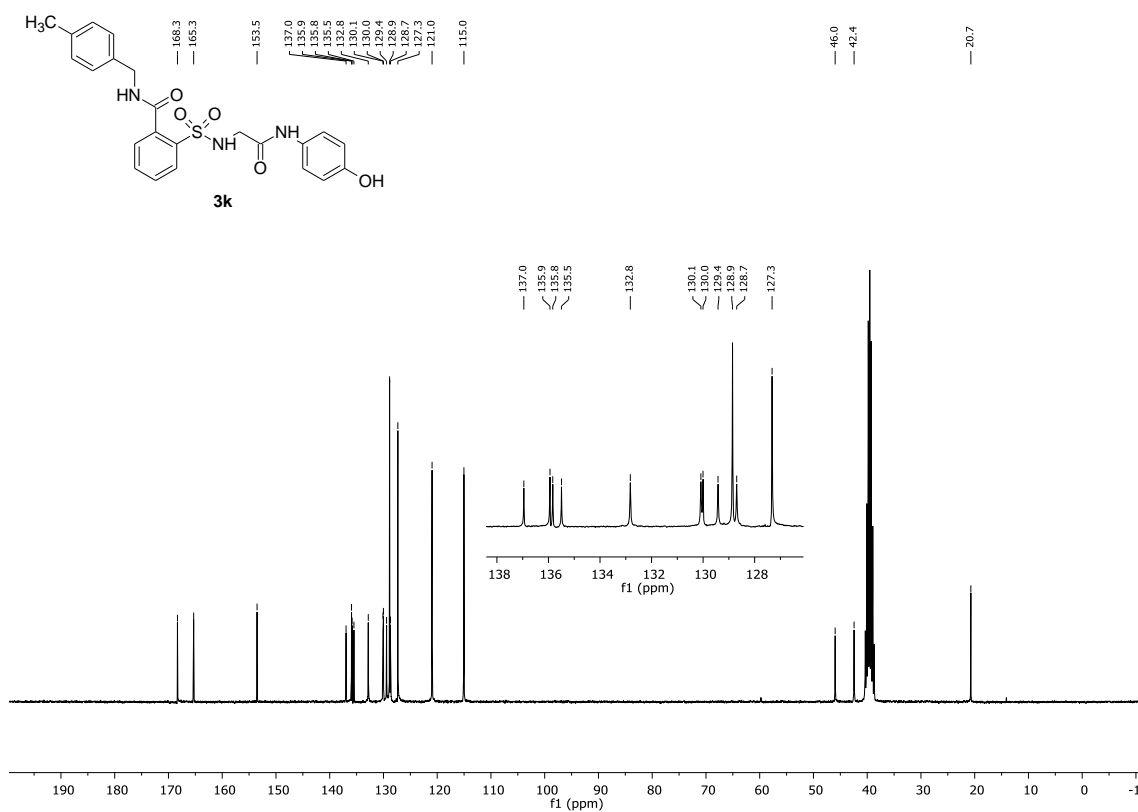

2-[[2-(4-Hydroxyanilino)-2-oxo-ethyl]sulfamoyl]-N-[(4-methoxyphenyl)methyl]benzamide 3I

<sup>1</sup>H-NMR 300 MHz, DMSO-d<sub>6</sub>

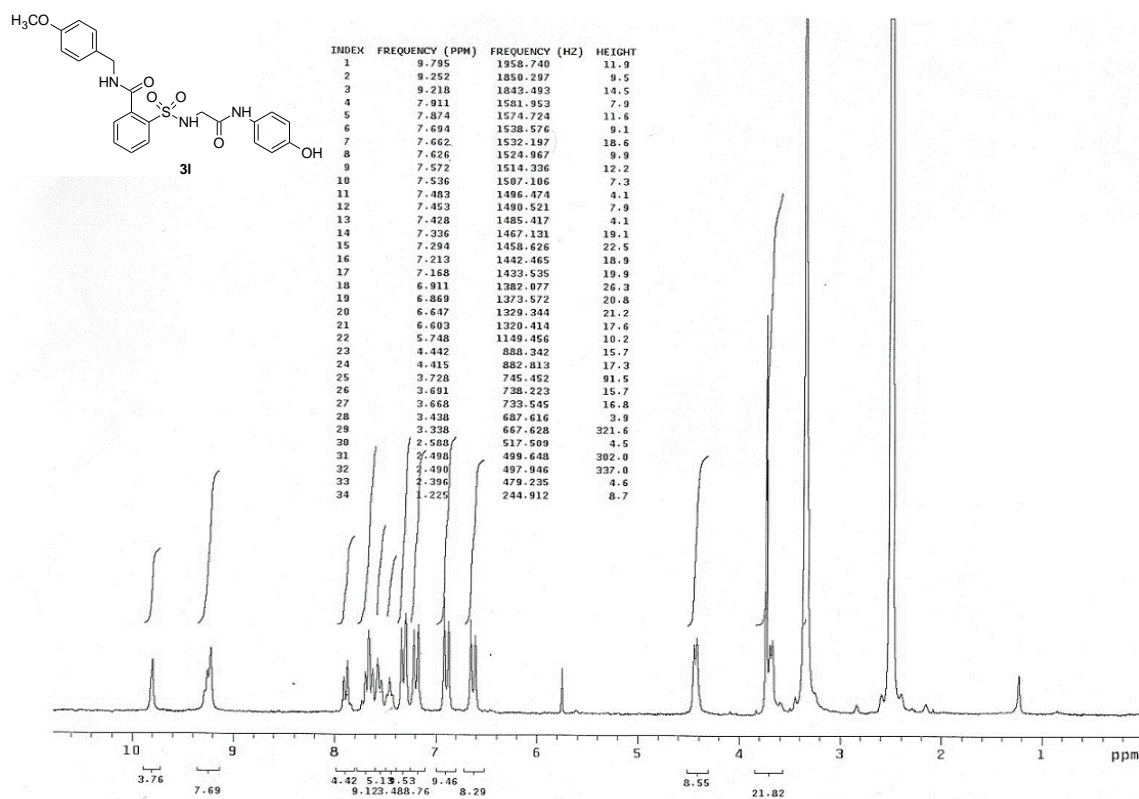

2-[[2-(4-Hydroxyanilino)-2-oxo-ethyl]sulfamoyl]-N-[(4-methoxyphenyl)methyl]benzamide 3I

<sup>13</sup>C-NMR 75 MHz, CD<sub>3</sub>OD

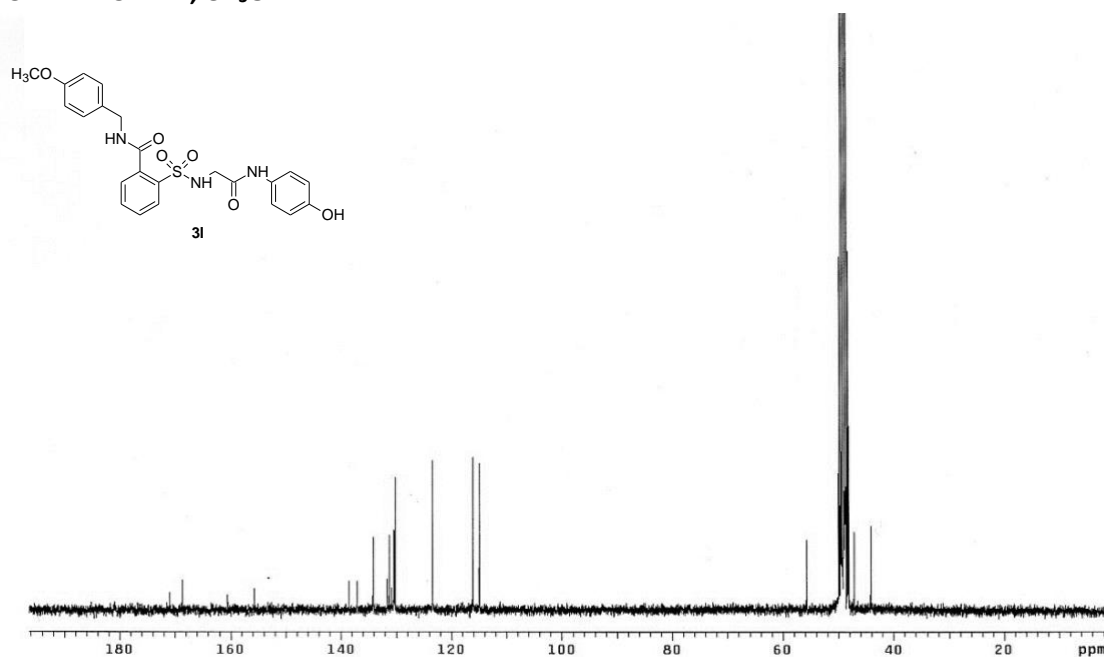

2-[[2-(4-Hydroxyanilino)-2-oxo-ethyl]sulfamoyl]-N-[(4-nitrophenyl)methyl]benzamide 3m

<sup>1</sup>H-NMR 300 MHz, CD<sub>3</sub>OD

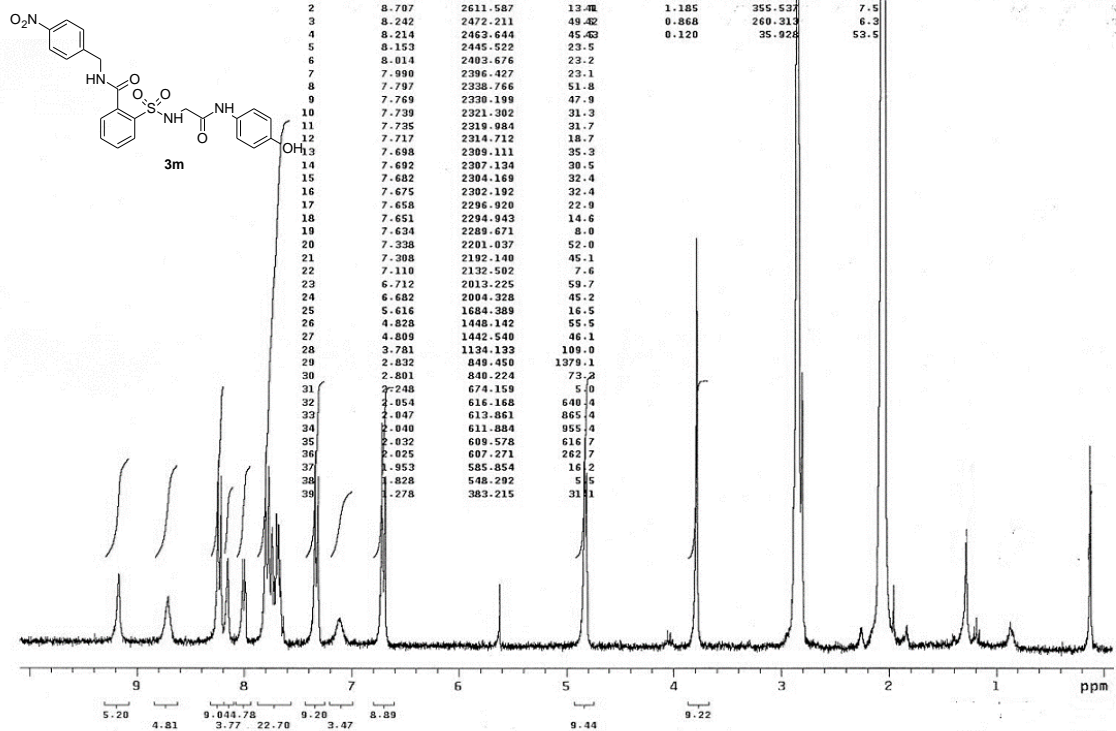

2-[[2-(4-Hydroxyanilino)-2-oxo-ethyl]sulfamoyl]-N-[(4-nitrophenyl)methyl]benzamide 3m

<sup>1</sup>H-NMR 300 MHz, CD<sub>3</sub>OD

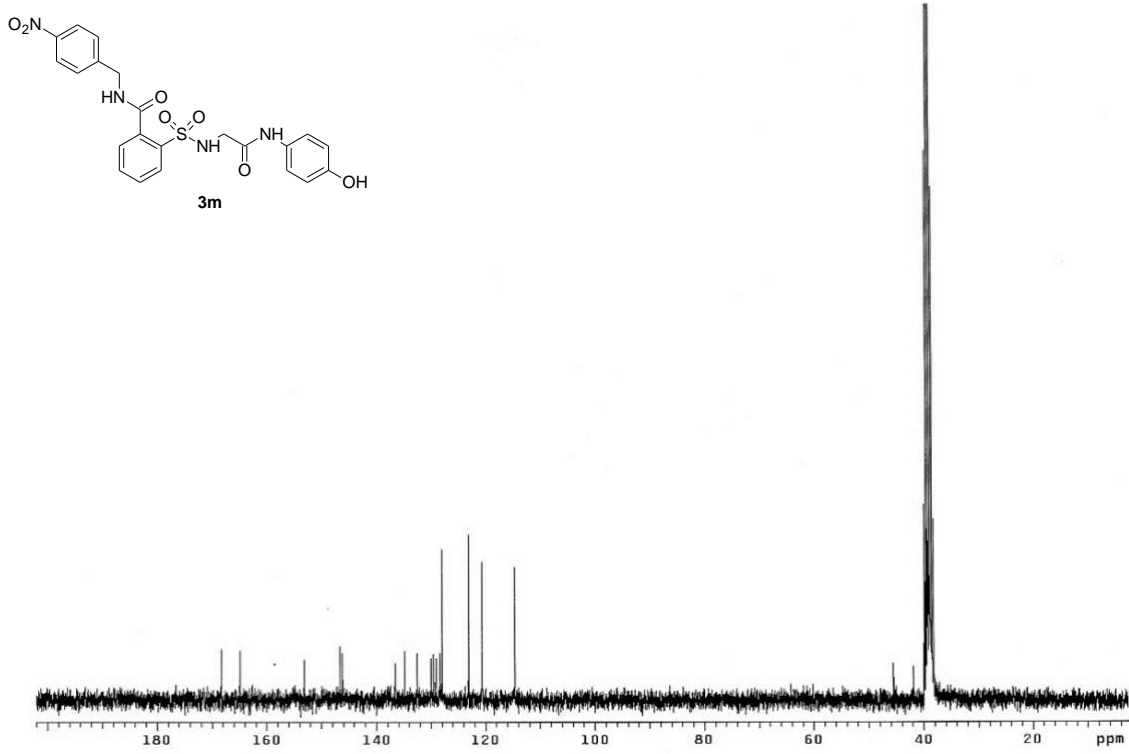

***N*-[(3-Chlorophenyl)methyl]-2-[[2-(4-hydroxyanilino)-2-oxo-ethyl]sulfamoyl]benzamide 3n**

**<sup>1</sup>H-NMR 300 MHz, DMSO-*d*<sub>6</sub>**

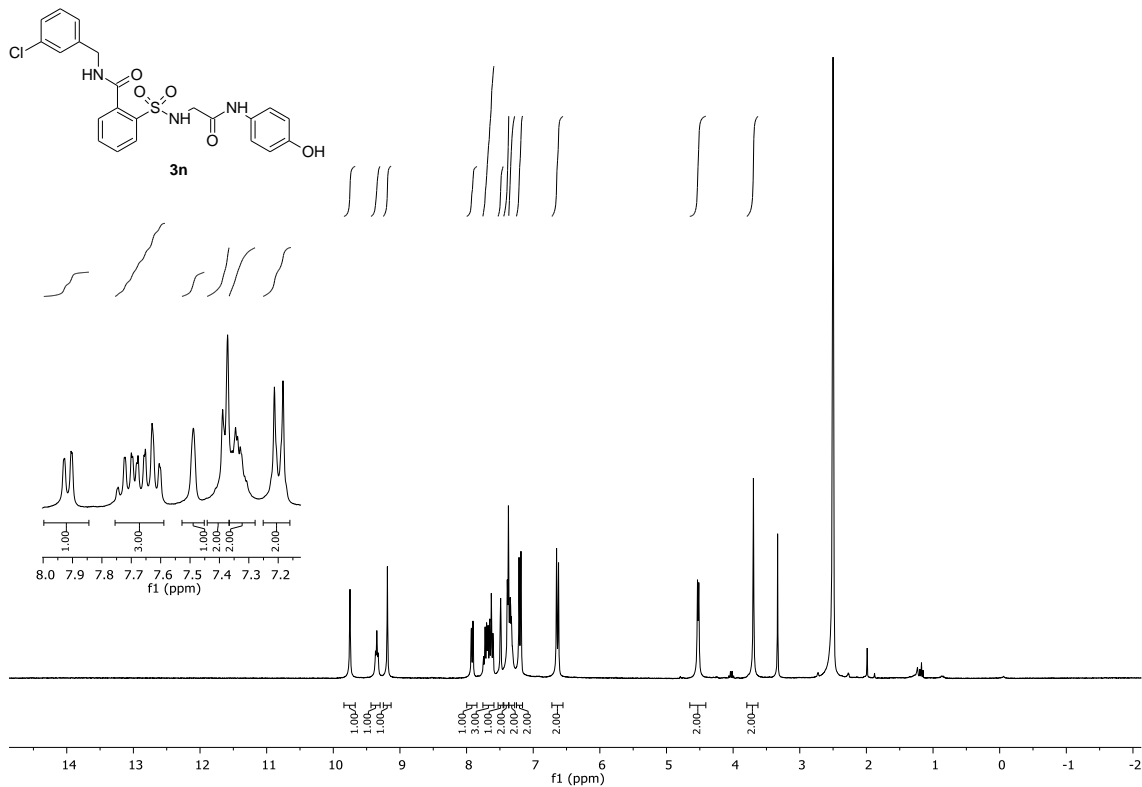

***N*-[(3-Chlorophenyl)methyl]-2-[[2-(4-hydroxyanilino)-2-oxo-ethyl]sulfamoyl]benzamide 3n**

**<sup>13</sup>C-NMR 75 MHz, DMSO-*d*<sub>6</sub>**

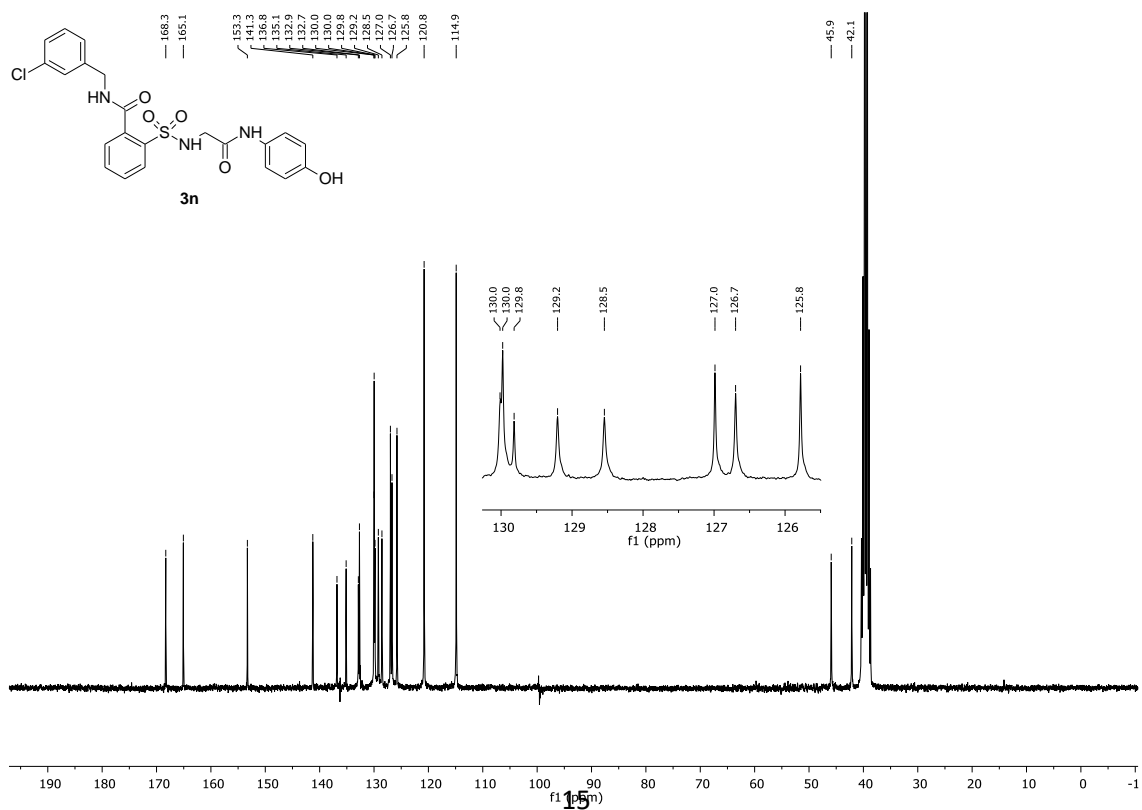

***N*-[(3,4-Dichlorophenyl)methyl]-2-[[2-(4-hydroxyanilino)-2-oxo-ethyl]sulfamoyl]benzamide  
3o**

**<sup>1</sup>H-NMR 300 MHz, DMSO-*d*<sub>6</sub>**

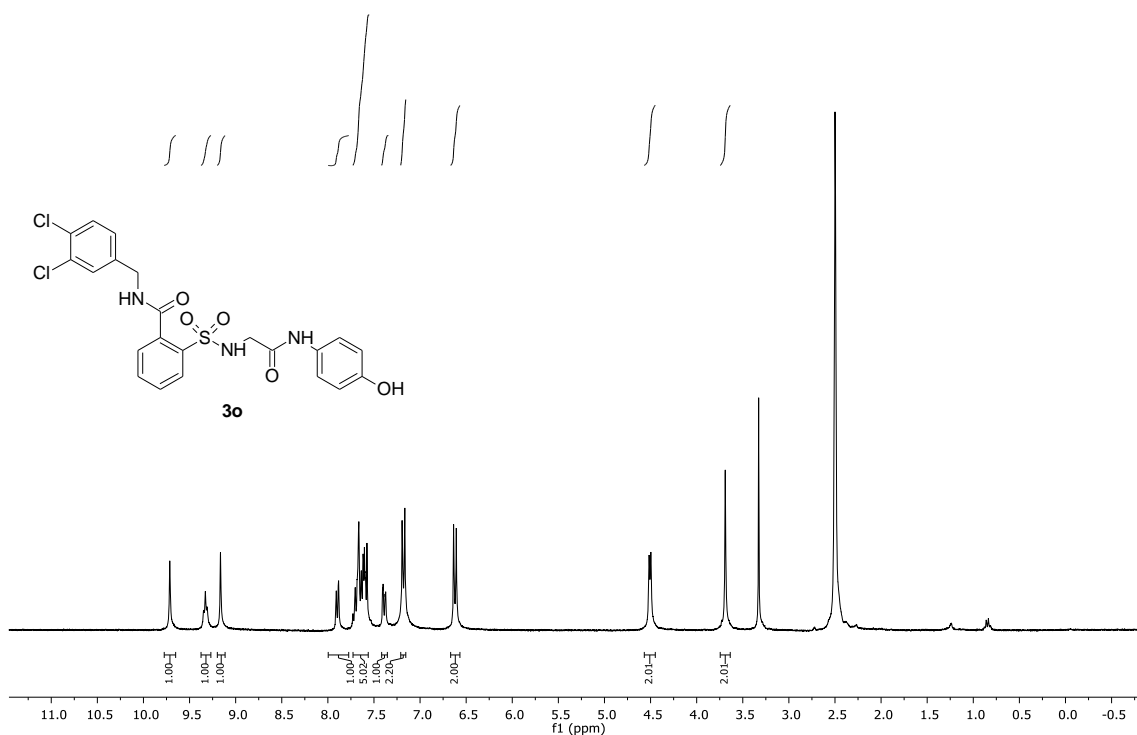

***N*-[(3,4-Dichlorophenyl)methyl]-2-[[2-(4-hydroxyanilino)-2-oxo-ethyl]sulfamoyl]benzamide  
3o**

**<sup>13</sup>C-NMR 75 MHz, CD<sub>3</sub>OD**

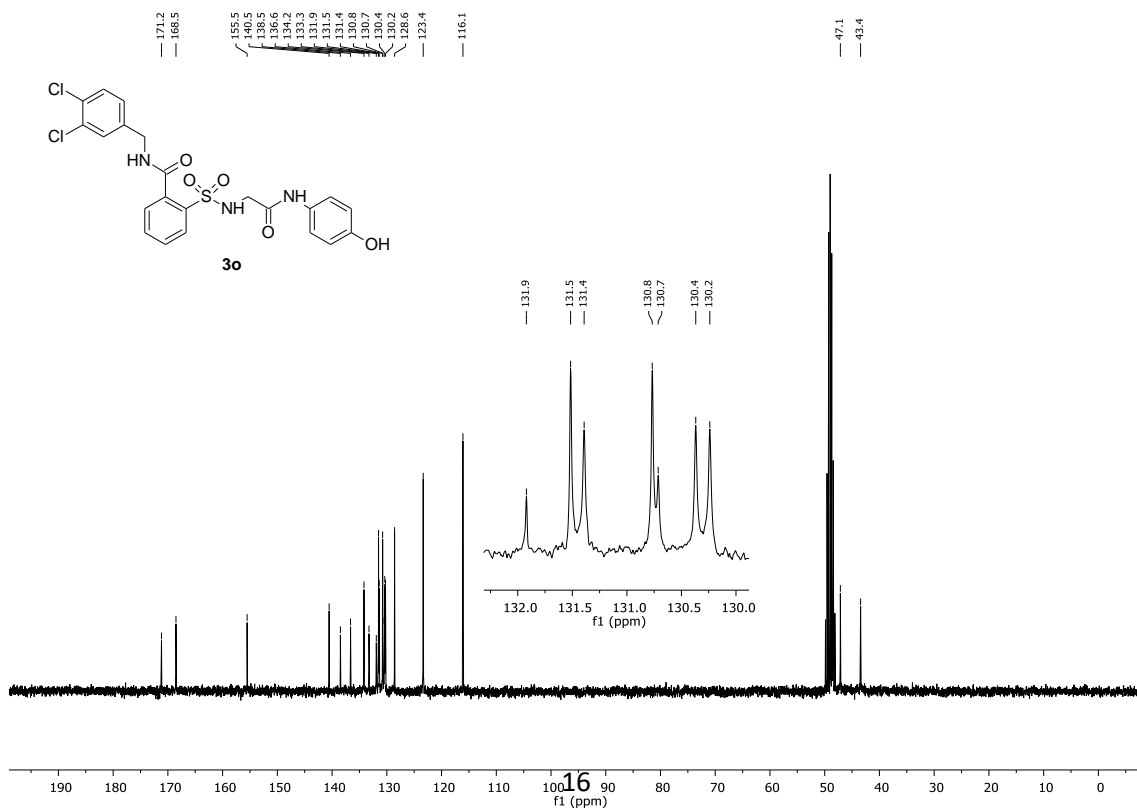



## 2-[[2-(4-Hydroxyanilino)-2-oxo-ethyl]sulfamoyl]-*N*-(2-pyridylmethyl)benzamide 3p

<sup>1</sup>H-NMR 300 MHz, DMSO-*d*<sub>6</sub>

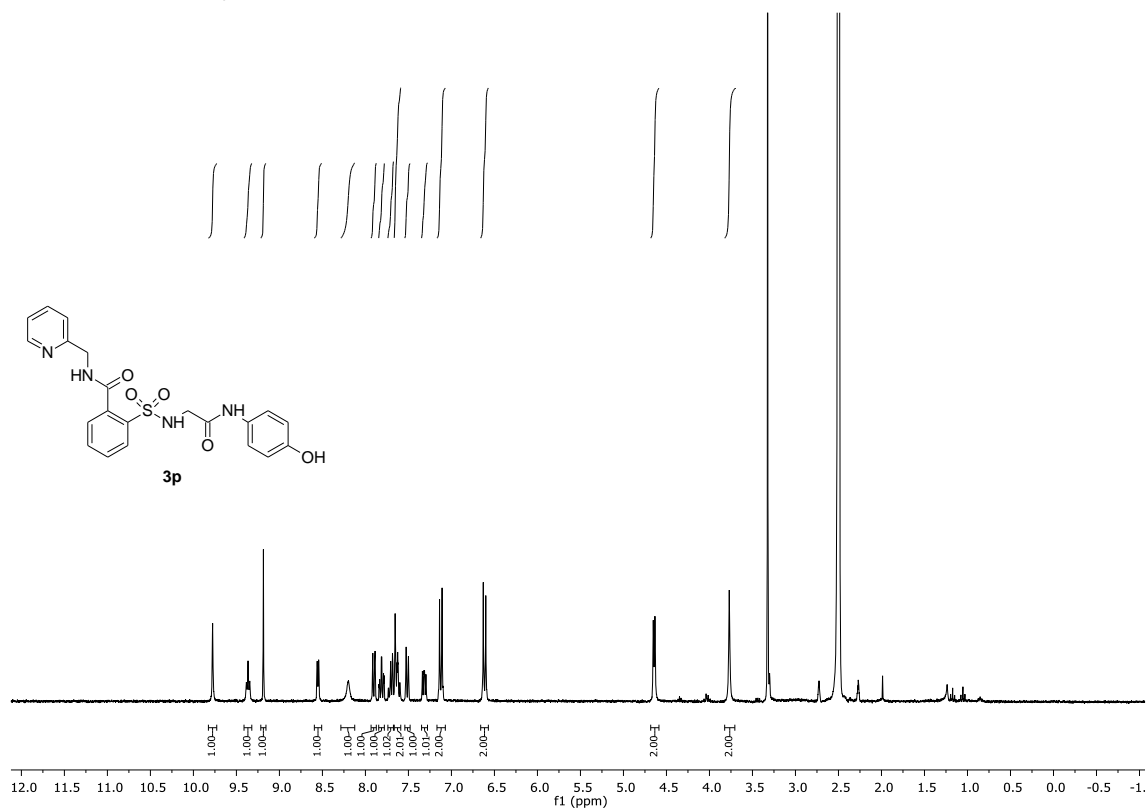

## 2-[[2-(4-Hydroxyanilino)-2-oxo-ethyl]sulfamoyl]-*N*-(2-pyridylmethyl)benzamide 3p

<sup>13</sup>C-NMR 75 MHz, CD<sub>3</sub>OD

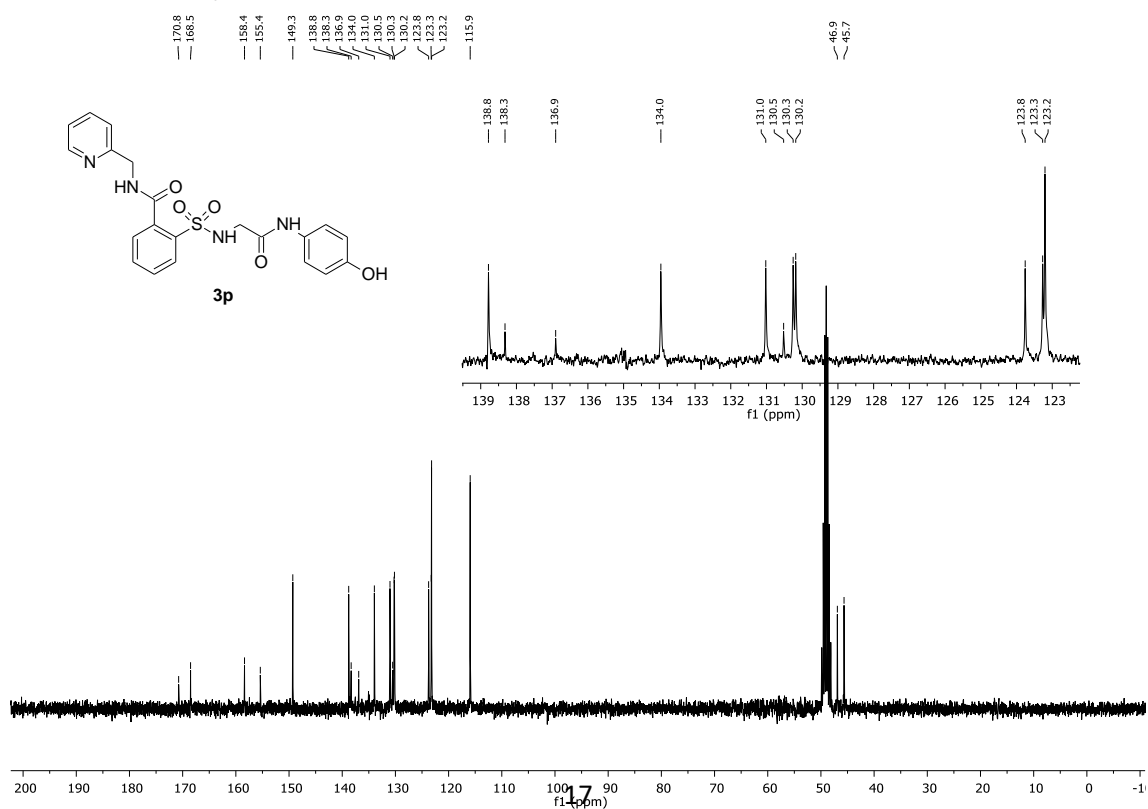

## 2-[[2-(4-Hydroxyanilino)-2-oxo-ethyl]sulfamoyl]-*N*-(2-phenylethyl)benzamide 3q

$^1\text{H-NMR}$  300 MHz,  $\text{DMSO-}d_6$

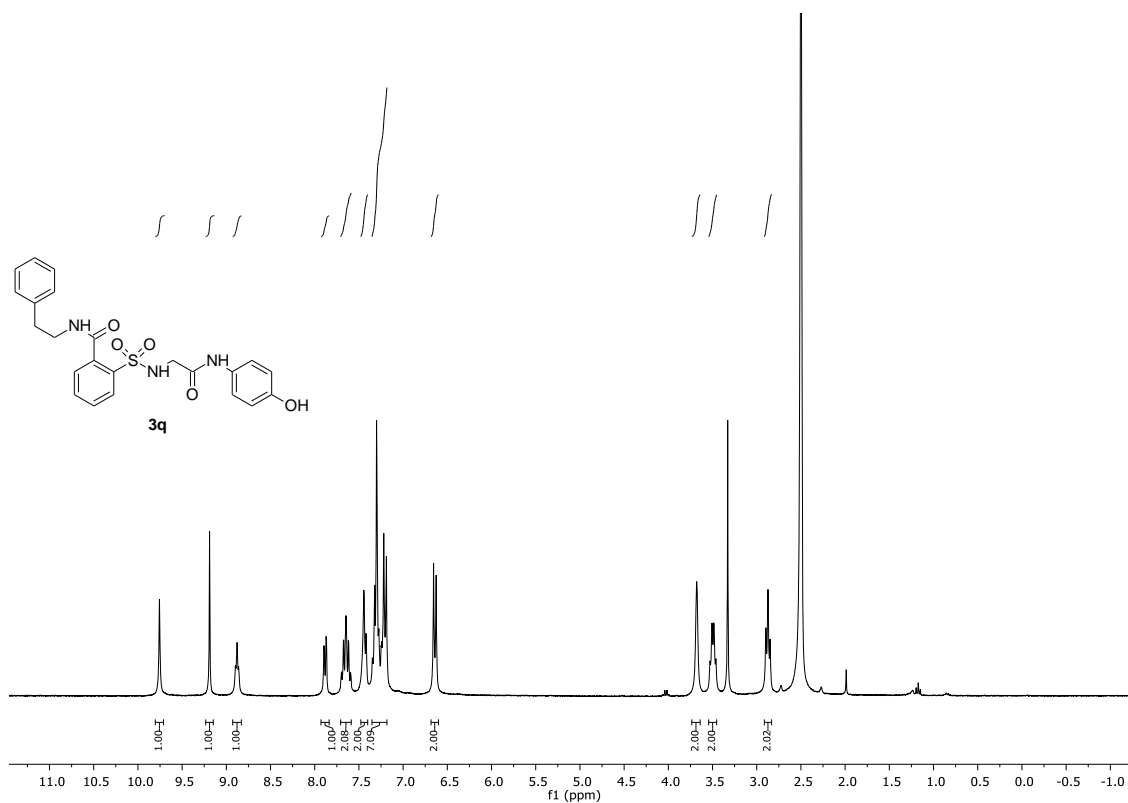

## 2-[[2-(4-Hydroxyanilino)-2-oxo-ethyl]sulfamoyl]-*N*-(2-phenylethyl)benzamide 3q

$^{13}\text{C-NMR}$  75 MHz,  $\text{CD}_3\text{OD}$

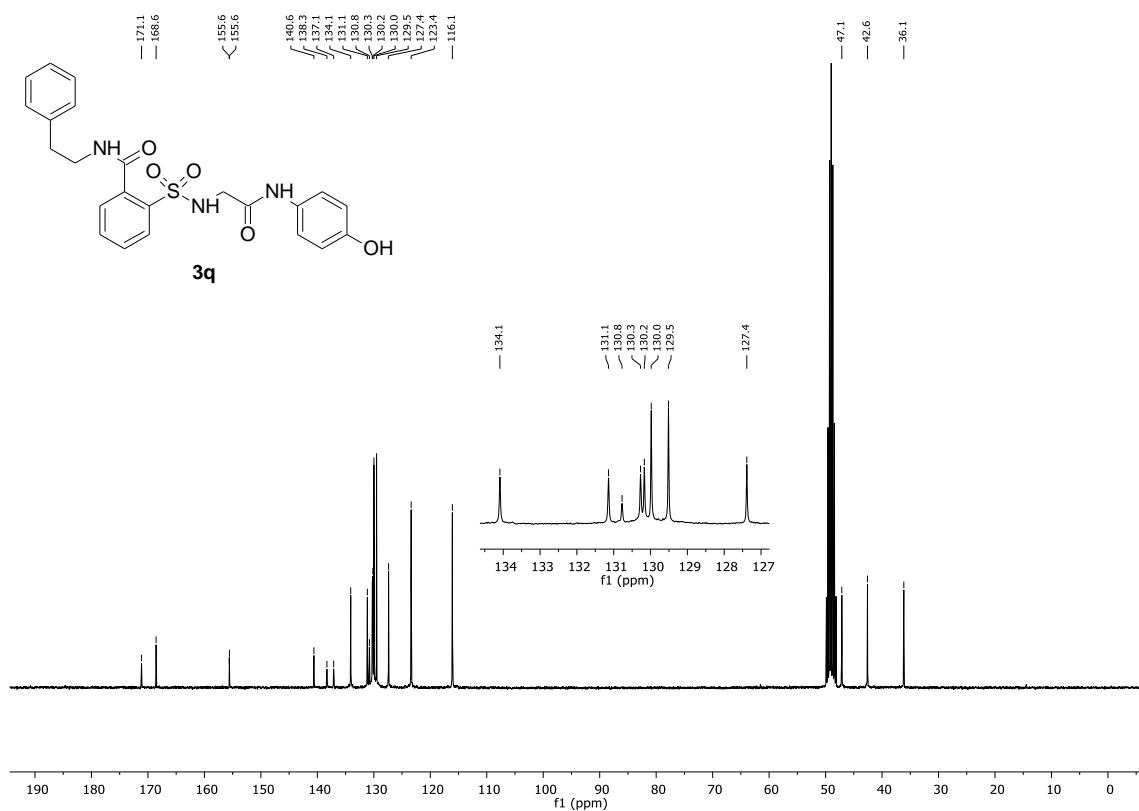

***N*-[2-(3,4-Dihydroxyphenyl)ethyl]-2-[[2-(4-hydroxyanilino)-2-oxo-ethyl]sulfamoyl]benzamide  
3r**

<sup>1</sup>H-NMR 300 MHz, DMSO-*d*<sub>6</sub>

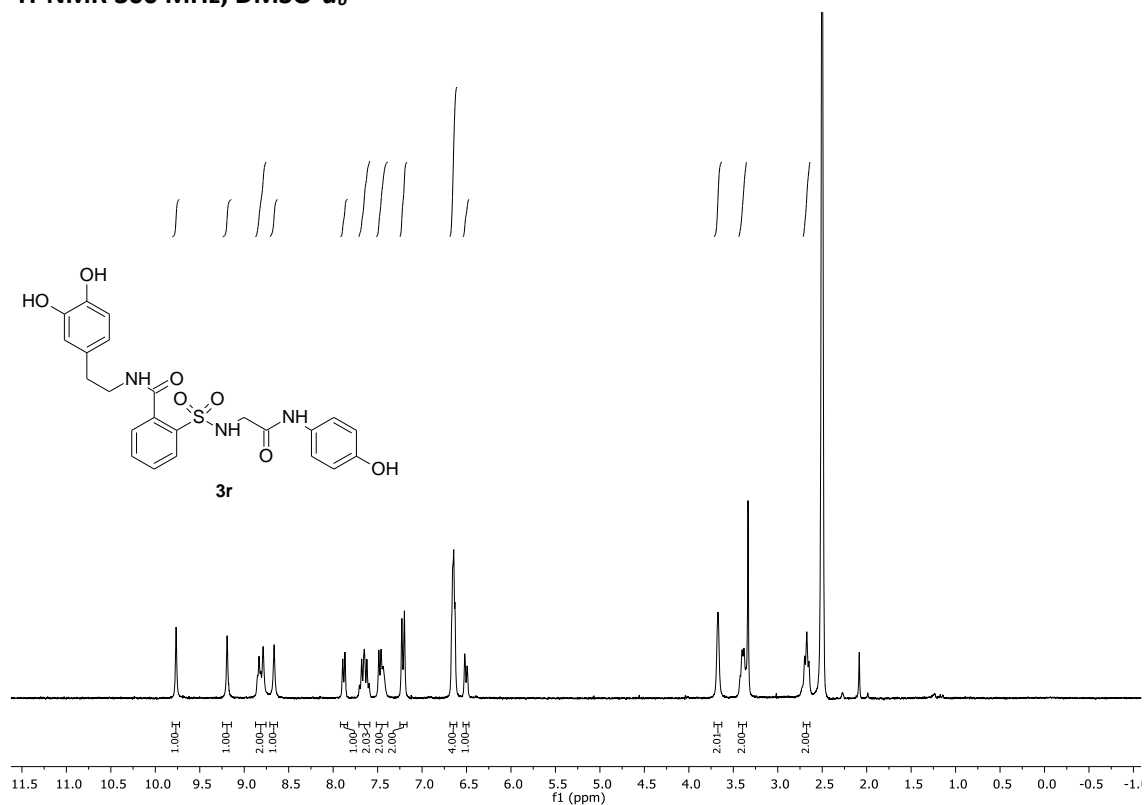

***N*-[2-(3,4-Dihydroxyphenyl)ethyl]-2-[[2-(4-hydroxyanilino)-2-oxo-ethyl]sulfamoyl]benzamide  
3r**

<sup>13</sup>C-NMR 75 MHz, DMSO-*d*<sub>6</sub>

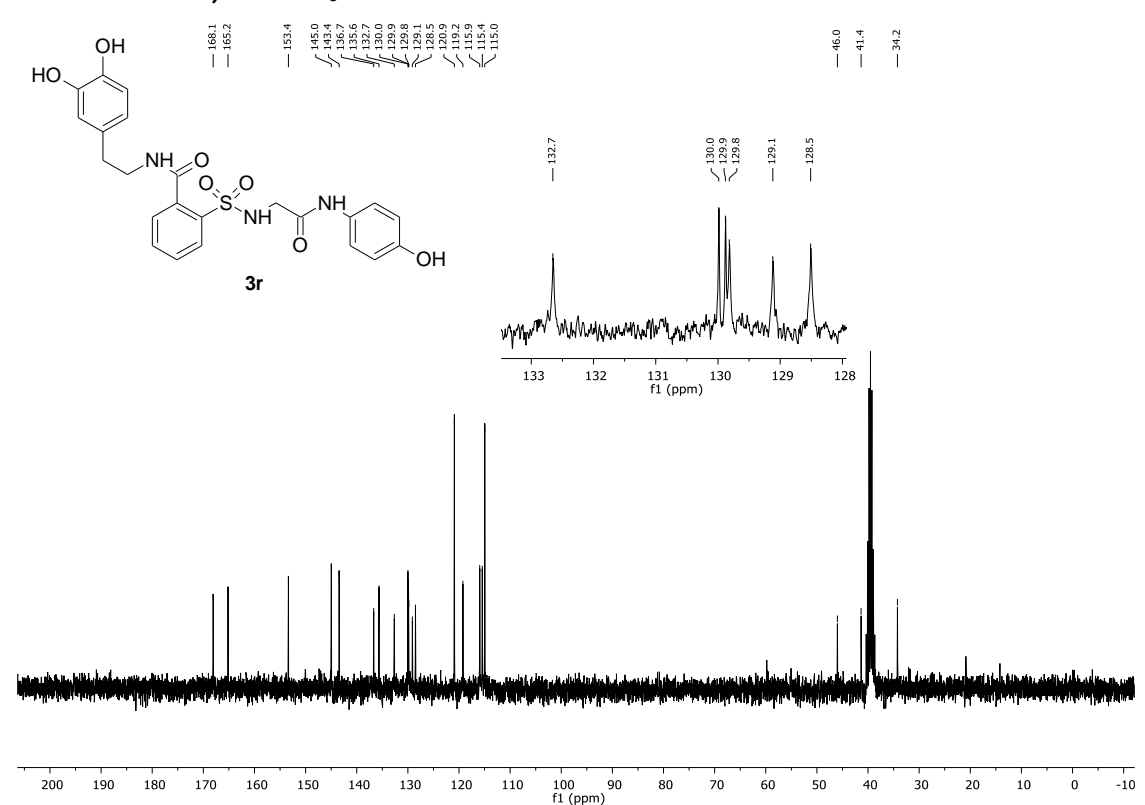

## 2-[[2-(4-Hydroxyanilino)-2-oxo-ethyl]sulfamoyl]-N-(2-pyrrolidin-1-ylethyl)benzamide 3s

<sup>1</sup>H-NMR 300 MHz, DMSO-*d*<sub>6</sub>

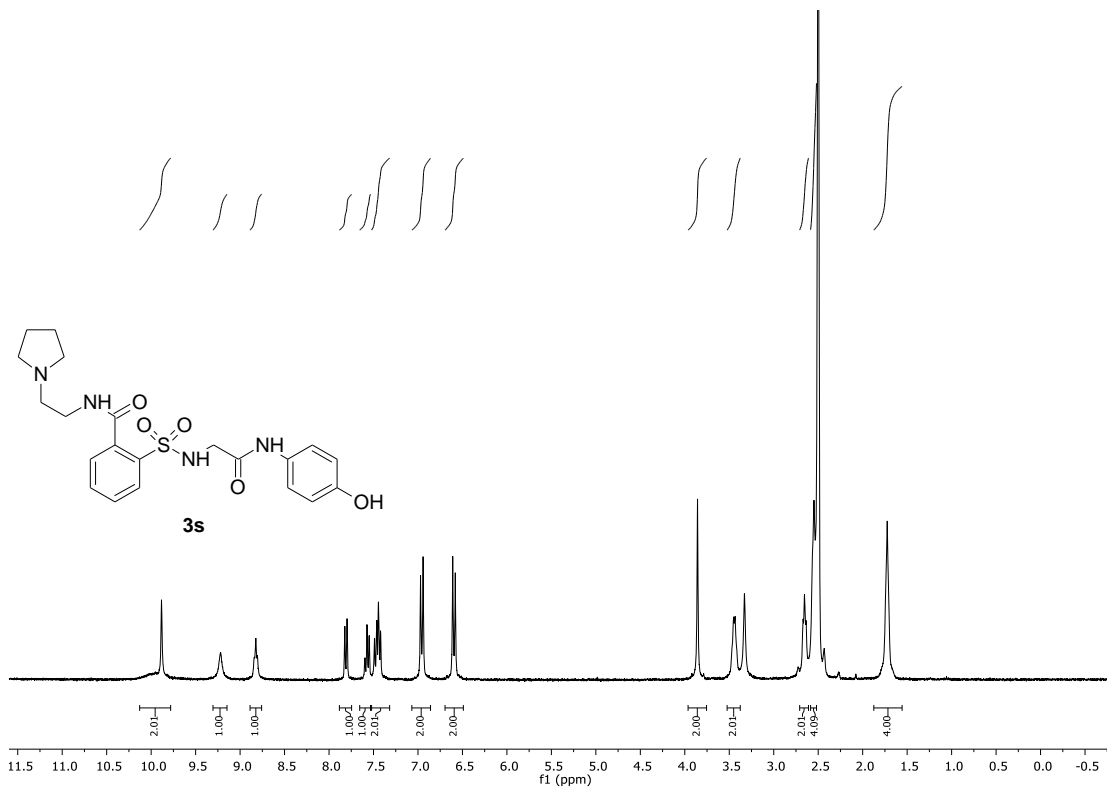

## 2-[[2-(4-Hydroxyanilino)-2-oxo-ethyl]sulfamoyl]-N-(2-pyrrolidin-1-ylethyl)benzamide 3s

<sup>13</sup>C-NMR 75 MHz, DMSO-*d*<sub>6</sub>

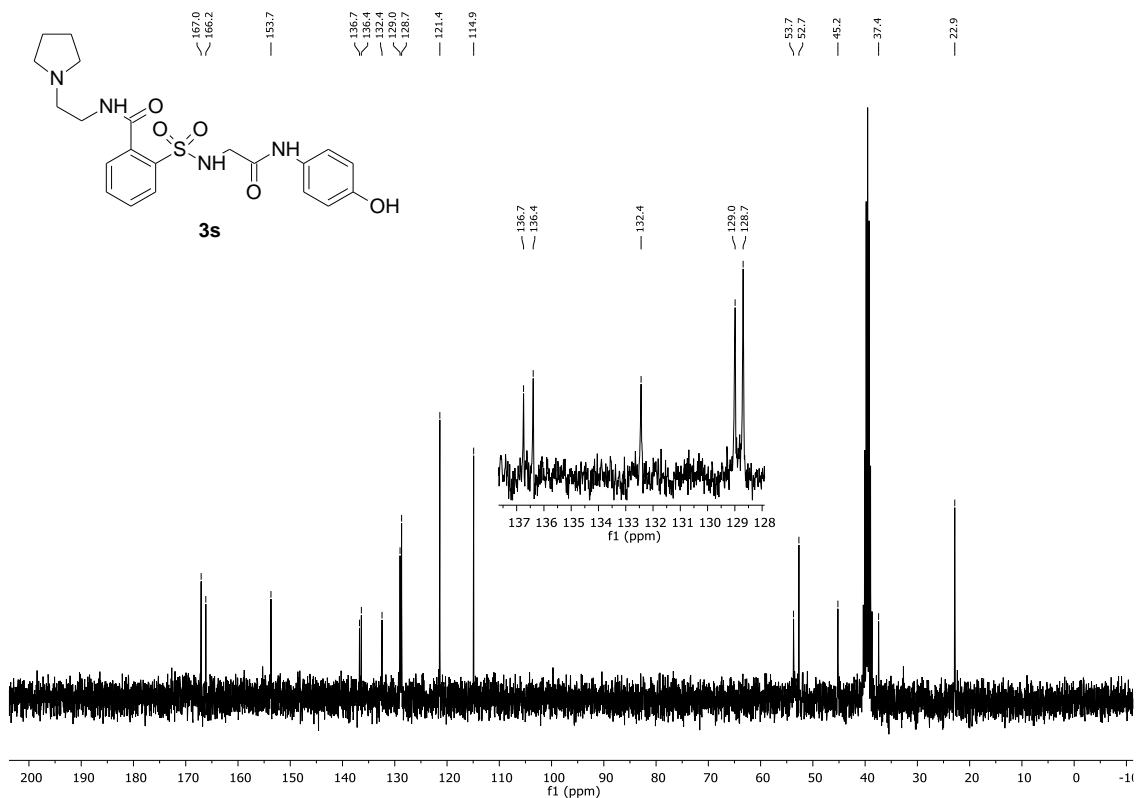

***N*-(4-Hydroxyphenyl)-2-[[2-(morpholine-4-carbonyl)phenyl]sulfonylamino]acetamide 3t**  
**<sup>1</sup>H-NMR 300 MHz, DMSO-*d*<sub>6</sub>**

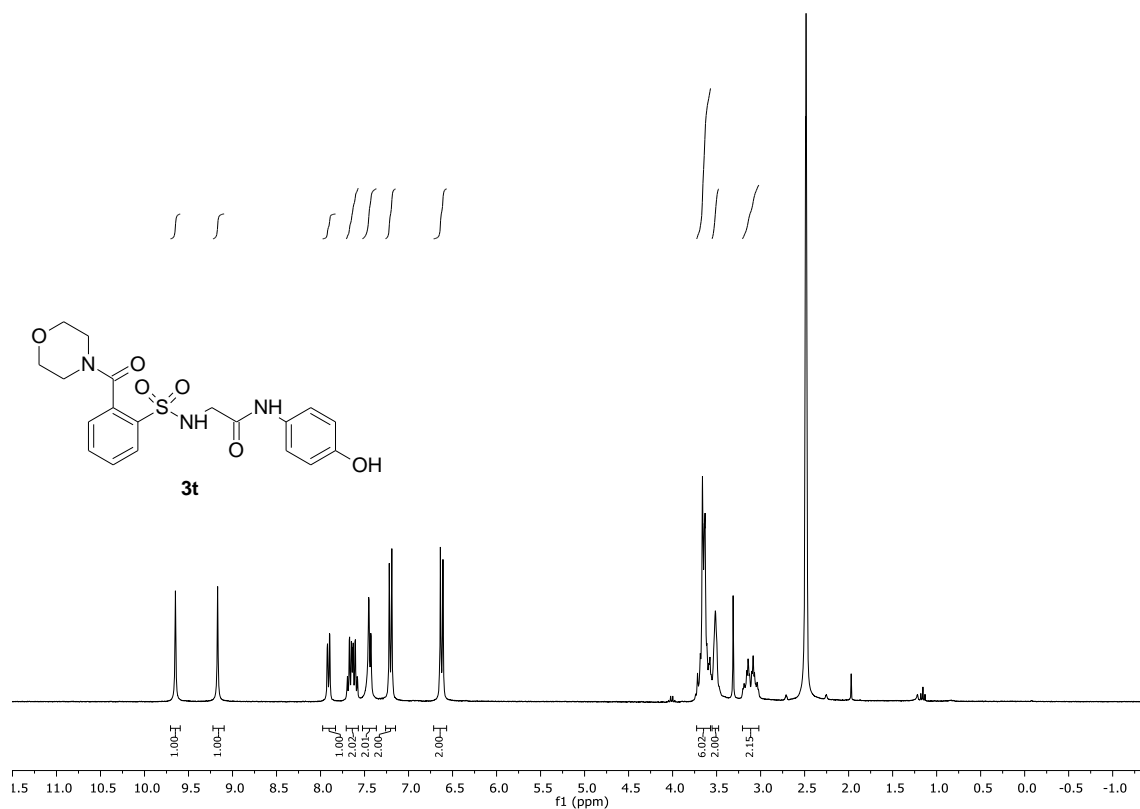

***N*-(4-Hydroxyphenyl)-2-[[2-(morpholine-4-carbonyl)phenyl]sulfonylamino]acetamide 3t**

**<sup>13</sup>C-NMR 75 MHz, DMSO-*d*<sub>6</sub>**

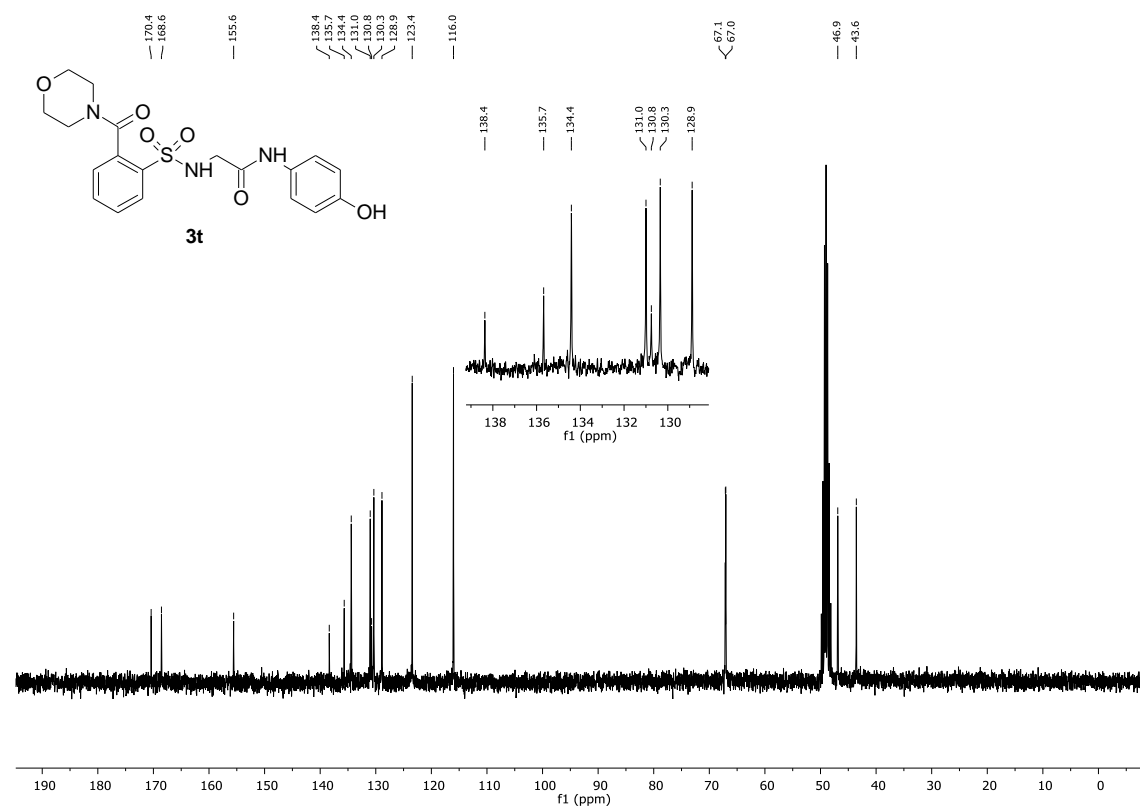

**2-[[2-(4-Benzylpiperazine-1-carbonyl)phenyl]sulfonylamino]-N-(4-hydroxyphenyl)acetamide**  
**3u**

<sup>1</sup>H-NMR 300 MHz, DMSO-d<sub>6</sub>

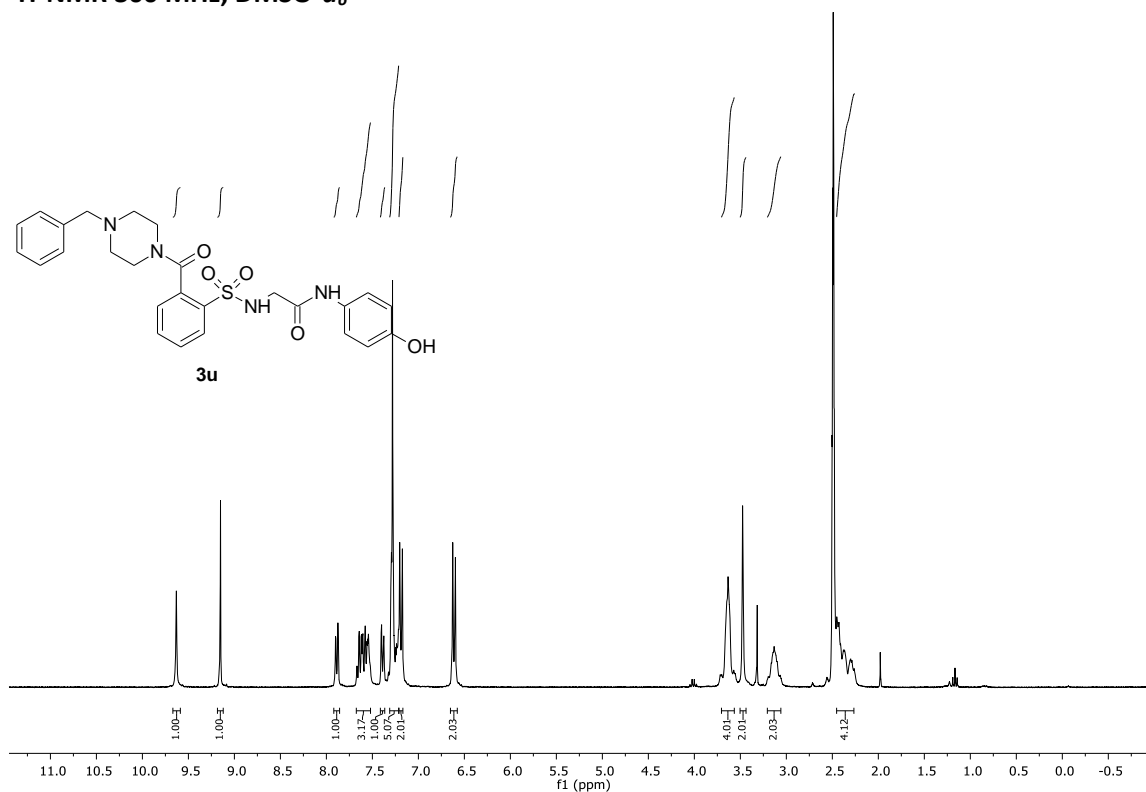

**2-[[2-(4-Benzylpiperazine-1-carbonyl)phenyl]sulfonylamino]-N-(4-hydroxyphenyl)acetamide**  
**3u**

<sup>13</sup>C-NMR 75 MHz, DMSO-d<sub>6</sub>

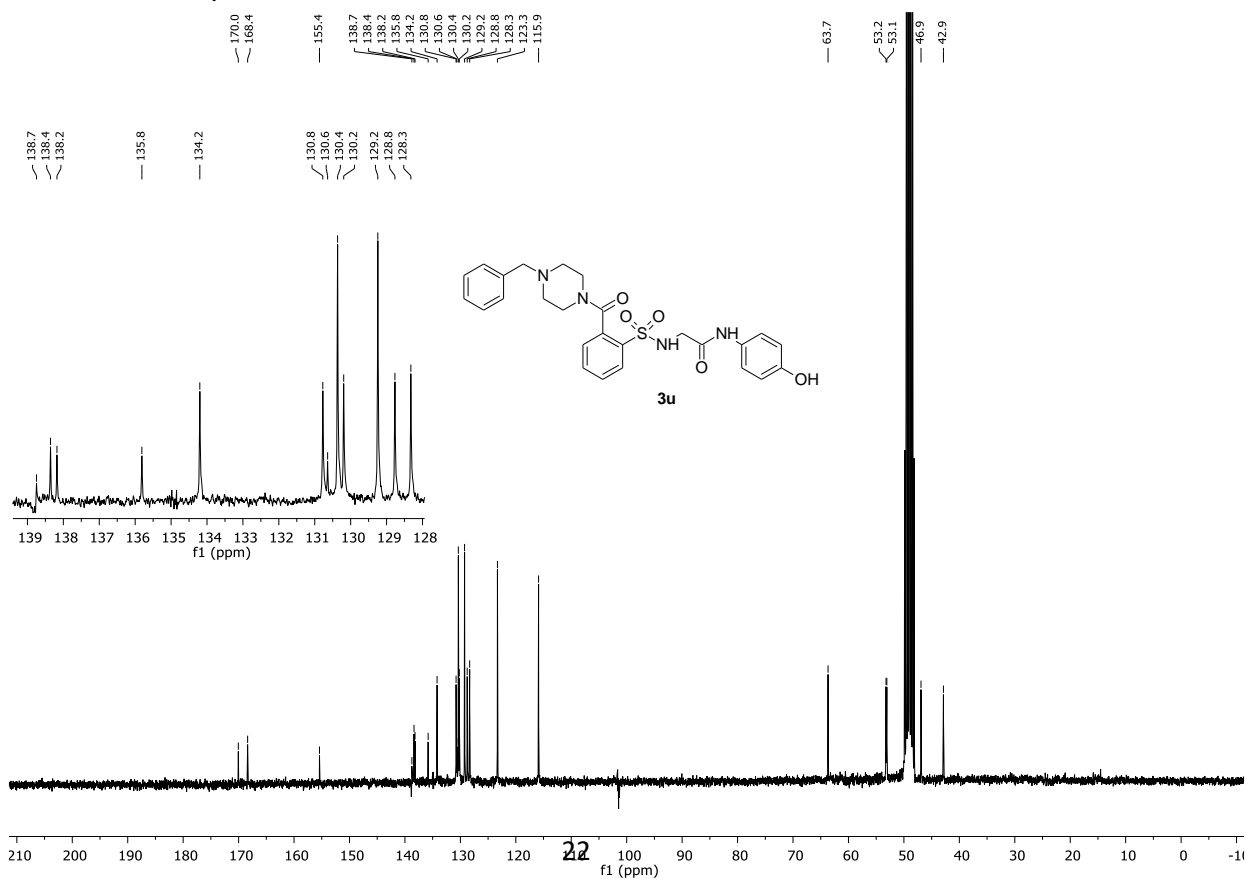

Supplement: mmc1.pdf [file mmc1.pdf]
